# Supplementary material for: Predicting lung adenocarcinoma disease progression using methylation-correlated blocks and ensemble machine learning classifiers
Source: PeerJ. 2021 Feb 16;9:e10884. doi: 10.7717/peerj.10884 (PMC7894106; doi:10.7717/peerj.10884)
Supplement: Table S2 — The elastic-net regression model is marked as “eNet”. [file peerj-09-10884-s005.xlsx]

## Sheet: 1.model comparsion training CV
MCB_no	CpGs	location	chromosomes	length	CpGs_num	cindex_COX_cv	cindex_SVR_cv	cindex_eNet_cv	cindex_em_cv	auc_COX_cv	auc_SVR_cv	auc_eNet_cv	auc_em_cv
698	cg16713727 cg10881110 cg06761377 cg15616400 cg03970032	chr1 : 16062720 - chr1 : 16062915	chr1	195	5	0.547622	0.447775	0.518652	0.547688	0.649337	0.607275	0.526782	0.649429
29233	cg23421023 cg05619892 cg19497501 cg22271921 cg20085411	chr8 : 40755165 - chr8 : 40755421	chr8	256	5	0.520048	0.526571	0.52644	0.520026	0.642	0.512574	0.523146	0.642103
29016	cg01957585 cg11323985 cg26118821 cg12082271 cg22276811	chr8 : 18541446 - chr8 : 18541627	chr8	181	5	0.530781	0.497251	0.527531	0.530759	0.611742	0.559381	0.570265	0.611741
22413	cg12298321 cg24874478 cg10165894 cg25622036 cg18738814	chr5 : 91988 - chr5 : 92385	chr5	397	5	0.530672	0.49038	0.537871	0.530563	0.608772	0.519835	0.588319	0.608446
14407	cg12171183 cg06198398 cg20469799 cg05498007 cg05529506 cg11931731	chr18 : 44526700 - chr18 : 44527026	chr18	326	6	0.553621	0.470921	0.531915	0.553665	0.603888	0.554029	0.581492	0.604121
17836	cg10794799 cg21597684 cg13869872 cg26094984 cg07853758	chr2 : 197457393 - chr2 : 197457430	chr2	37	5	0.510275	0.493586	0.517517	0.510188	0.600311	0.496623	0.569685	0.60045
19742	cg09667013 cg04717802 cg08431931 cg01059385 cg22189786	chr22 : 42394590 - chr22 : 42395067	chr22	477	5	0.552792	0.45096	0.517059	0.552836	0.593266	0.518756	0.57295	0.593314
4299	cg03804621 cg16299003 cg14374521 cg11218091 cg11216554 cg14708218 cg18195080 cg15252215 cg12474023 cg19634157 cg09019052 cg20072242 cg12346673 cg22704326 cg10241347 cg09533473 cg11729970	chr10 : 124638756 - chr10 : 124639630	chr10	874	17	0.532613	0.509664	0.540925	0.532613	0.591959	0.480048	0.609139	0.591959
19602	cg22542751 cg00788739 cg01284869 cg01369114 cg03970350 cg26532826 cg11875119	chr22 : 31002892 - chr22 : 31003147	chr22	255	7	0.531348	0.520201	0.531806	0.531239	0.587162	0.512022	0.570634	0.58669
18652	cg07071389 cg06686029 cg08101407 cg24867524 cg03105222	chr20 : 30777790 - chr20 : 30778399	chr20	609	5	0.499062	0.494852	0.535362	0.499106	0.581399	0.570645	0.58833	0.581299
21609	cg05551114 cg06097727 cg01939704 cg07538039 cg22109796 cg01198391	chr4 : 15376116 - chr4 : 15376180	chr4	64	6	0.545942	0.505999	0.47849	0.545812	0.579457	0.553344	0.540099	0.579957
19613	cg01338084 cg26448406 cg17599586 cg22884130 cg25791279 cg11267065	chr22 : 32026380 - chr22 : 32026916	chr22	536	6	0.511366	0.514376	0.520986	0.511126	0.579386	0.486741	0.515949	0.579034
8231	cg19313015 cg21645164 cg21273703 cg00256785 cg23653008 cg27040423 cg27084026	chr12 : 133464323 - chr12 : 133464496	chr12	173	7	0.50517	0.509642	0.492932	0.505301	0.578816	0.483145	0.516509	0.578824
10788	cg07626874 cg13398806 cg09149294 cg00091596 cg24524750 cg24643749 cg00392242 cg00012522 cg05595345 cg22755932	chr15 : 98503768 - chr15 : 98504668	chr15	900	10	0.511453	0.523451	0.470833	0.511497	0.574456	0.509708	0.442568	0.574498
29648	cg22524061 cg14657725 cg23820828 cg03157027 cg04768602	chr8 : 99959430 - chr8 : 99960148	chr8	718	5	0.515925	0.461693	0.517038	0.515881	0.57449	0.57279	0.566616	0.574396
7671	cg03311459 cg03808158 cg25130672 cg12411093 cg01583034 cg03313212 cg05119480 cg04578997 cg21548032	chr12 : 104850321 - chr12 : 104850767	chr12	446	9	0.515576	0.535166	0.531108	0.515729	0.574007	0.51302	0.591269	0.574217
1239	cg24591770 cg20820767 cg00150520 cg10329345 cg13189207	chr1 : 45082704 - chr1 : 45083124	chr1	420	5	0.522579	0.523604	0.487893	0.522579	0.574227	0.473253	0.498468	0.574134
21294	cg17227257 cg16721321 cg26130533 cg14505741 cg11104416 cg18085660 cg11888738	chr4 : 1202694 - chr4 : 1202911	chr4	217	7	0.543717	0.509773	0.515663	0.543717	0.57311	0.526333	0.590581	0.57311
21292	cg01784327 cg12072001 cg14771077 cg05318361 cg25002788 cg23848471 cg22576236 cg22602105	chr4 : 1166755 - chr4 : 1166990	chr4	235	8	0.534053	0.488089	0.512456	0.534162	0.572747	0.566302	0.492319	0.572778
11842	cg27589088 cg06653898 cg05707714 cg11762513 cg08803263	chr16 : 80966033 - chr16 : 80966302	chr16	269	5	0.518608	0.497622	0.529996	0.518586	0.571012	0.47562	0.558212	0.571032
21484	cg13168683 cg08073882 cg10748160 cg08377398 cg04865110	chr4 : 6202379 - chr4 : 6202558	chr4	179	5	0.513743	0.50781	0.544045	0.513722	0.571079	0.514213	0.590679	0.57102
17984	cg14941457 cg14831838 cg16531271 cg14910495 cg26682866 cg15442811	chr2 : 219824293 - chr2 : 219824401	chr2	108	6	0.495899	0.495179	0.491907	0.495942	0.569909	0.499243	0.52611	0.569527
12275	cg16441919 cg10718894 cg25334860 cg20612875 cg01466631	chr17 : 1094029 - chr17 : 1094369	chr17	340	5	0.529232	0.50288	0.502421	0.529145	0.569397	0.551195	0.565841	0.569445
3604	cg27608999 cg04194494 cg21981270 cg16831085 cg10069493 cg00675569 cg09806262	chr10 : 45914276 - chr10 : 45914949	chr10	673	7	0.532352	0.46815	0.480192	0.532657	0.567966	0.526274	0.515105	0.567995
24946	cg11353380 cg11485463 cg21122656 cg02704535 cg19677203 cg22847691 cg00929855 cg12643366 cg15174834 cg12883479 cg10598353 cg13413286 cg17494781 cg18466674	chr6 : 31783196 - chr6 : 31783545	chr6	349	14	0.505323	0.490401	0.528599	0.505301	0.563888	0.46825	0.581357	0.563943
22996	cg00860322 cg23528652 cg01768981 cg08514736 cg12310673 cg22449302 cg21231288 cg13352495	chr5 : 54528989 - chr5 : 54529851	chr5	862	8	0.507919	0.483791	0.502923	0.507941	0.560888	0.501586	0.505758	0.560843
19511	cg16021775 cg16110940 cg14831990 cg10004574 cg27147871	chr22 : 21400059 - chr22 : 21400184	chr22	125	5	0.504341	0.502356	0.506239	0.504341	0.560415	0.509142	0.454864	0.560477
1457	cg03140521 cg13184736 cg13399816 cg25189904 cg26764244	chr1 : 68299388 - chr1 : 68299511	chr1	123	5	0.562107	0.517212	0.563962	0.562064	0.559601	0.516579	0.545578	0.559989
23895	cg19626725 cg00080972 cg21226059 cg14820908 cg02136620 cg09060608 cg05457628 cg22764044 cg26516362	chr5 : 178986131 - chr5 : 178986906	chr5	775	9	0.529581	0.49483	0.470484	0.529581	0.560295	0.503208	0.474891	0.559988
16026	cg11330104 cg00028487 cg07819497 cg02247561 cg09448982 cg23197935	chr19 : 53030705 - chr19 : 53031138	chr19	433	6	0.525196	0.509642	0.475458	0.525414	0.557481	0.488359	0.483028	0.557798
30623	cg08363715 cg03811055 cg17880859 cg07096248 cg16978043 cg03048084 cg15289846	chrX : 16888027 - chrX : 16888880	chrX	853	7	0.500502	0.529407	0.496248	0.50048	0.554985	0.541334	0.531111	0.554684
6846	cg09172548 cg04804877 cg08192350 cg03397307 cg16133088 cg05972871 cg26955987 cg03485694 cg12710510	chr12 : 3862221 - chr12 : 3862497	chr12	276	9	0.509053	0.481414	0.500611	0.508813	0.554184	0.505507	0.514757	0.554334
16168	cg15170743 cg22935456 cg09265529 cg24334111 cg16722964 cg27544219	chr19 : 57078521 - chr19 : 57078794	chr19	273	6	0.489769	0.515227	0.508791	0.489921	0.553771	0.49787	0.505151	0.554283
3926	cg22044002 cg00714725 cg14375937 cg02825977 cg17011709	chr10 : 94825547 - chr10 : 94826053	chr10	506	5	0.499891	0.480432	0.521401	0.499956	0.553115	0.512847	0.544301	0.553062
19449	cg20279673 cg12159189 cg08417728 cg05135549 cg07639287	chr22 : 17850431 - chr22 : 17850911	chr22	480	5	0.527487	0.508421	0.526156	0.527465	0.552727	0.545064	0.535523	0.552917
6208	cg01943983 cg08683012 cg15006118 cg09286493 cg07233109	chr11 : 78387190 - chr11 : 78387423	chr11	233	5	0.535035	0.533159	0.455366	0.535013	0.55291	0.511538	0.441246	0.552787
13533	cg17255712 cg04506585 cg22201614 cg11732642 cg02788090	chr17 : 70116185 - chr17 : 70116681	chr17	496	5	0.541361	0.538765	0.535646	0.541383	0.55242	0.512426	0.549265	0.552452
59	cg04972348 cg06618740 cg15414773 cg21475076 cg14476334	chr1 : 1100035 - chr1 : 1100557	chr1	522	5	0.508944	0.501047	0.508791	0.509097	0.552395	0.481928	0.546424	0.552452
1797	cg26570165 cg25386234 cg13107768 cg24434800 cg00667647 cg26856924 cg27268556	chr1 : 119541833 - chr1 : 119542629	chr1	796	7	0.481435	0.506086	0.480868	0.481457	0.551132	0.568442	0.449966	0.551088
28121	cg26663651 cg08528826 cg23152743 cg24956250 cg15506157 cg00919016 cg00699934 cg05224190 cg25181507	chr7 : 139167960 - chr7 : 139168659	chr7	699	9	0.505781	0.49736	0.516296	0.505781	0.550207	0.546106	0.574143	0.550229
1661	cg19378640 cg13932362 cg23599104 cg26045220 cg00009167 cg09820792 cg27430662 cg04994773 cg06059849	chr1 : 109656145 - chr1 : 109656930	chr1	785	9	0.516928	0.510209	0.506414	0.516928	0.549303	0.490087	0.516131	0.549303
26020	cg06849960 cg10105971 cg17689707 cg27289153 cg24514884	chr6 : 134638742 - chr6 : 134639203	chr6	461	5	0.520484	0.491754	0.526462	0.520572	0.547324	0.573106	0.55792	0.547335
17302	cg02169857 cg08570243 cg03250220 cg09068086 cg10366439	chr2 : 110969641 - chr2 : 110970249	chr2	608	5	0.519132	0.491819	0.518303	0.51935	0.546656	0.573411	0.554597	0.547278
2697	cg19646445 cg07158797 cg22356593 cg02118652 cg08466883	chr1 : 215740697 - chr1 : 215741318	chr1	621	5	0.50096	0.522251	0.471859	0.50096	0.546988	0.530501	0.517864	0.546967
14541	cg12699371 cg06562865 cg15129823 cg21634365 cg15484988 cg00854242 cg26721264 cg15146859 cg15343119 cg10486998 cg03175653 cg03032214 cg03659519 cg20872937 cg17911318 cg03502002 cg04534765 cg06360427	chr18 : 74961424 - chr18 : 74962672	chr18	1248	18	0.494394	0.538176	0.486802	0.494372	0.546076	0.578729	0.511133	0.546089
23867	cg09339527 cg08270223 cg06599677 cg27654142 cg02064237	chr5 : 178322752 - chr5 : 178323492	chr5	740	5	0.516667	0.507417	0.489398	0.516558	0.546614	0.522234	0.569325	0.54583
16202	cg06458239 cg10729426 cg19060970 cg20607331 cg16697731 cg01601746 cg13644629 cg07054095 cg17684296 cg06616879	chr19 : 58038573 - chr19 : 58039253	chr19	680	10	0.481763	0.487435	0.483551	0.481719	0.545678	0.537206	0.497664	0.545683
28154	cg22799656 cg09998133 cg06557057 cg06779469 cg12652174 cg21621906 cg08430489 cg09493063	chr7 : 142494564 - chr7 : 142494985	chr7	421	8	0.554647	0.538831	0.47801	0.554559	0.544512	0.60069	0.420248	0.544526
13265	cg01147550 cg01429662 cg22259831 cg16206138 cg19133221 cg18208707 cg03167683 cg02445664	chr17 : 47210027 - chr17 : 47210599	chr17	572	8	0.543935	0.548582	0.540074	0.543914	0.544164	0.523343	0.556363	0.544164
20201	cg04970117 cg02716516 cg20829379 cg25924911 cg22497313 cg08826127	chr3 : 45838037 - chr3 : 45838226	chr3	189	6	0.507832	0.504799	0.517387	0.507723	0.544279	0.487749	0.570598	0.544138
18063	cg00698413 cg10114725 cg25313930 cg24516901 cg01244015 cg01833675	chr2 : 225266656 - chr2 : 225266876	chr2	220	6	0.485973	0.512936	0.513329	0.486038	0.54391	0.502989	0.558058	0.543854
24292	cg12349884 cg21269897 cg16991515 cg02599464 cg12920393 cg07636194 cg01804925 cg22272282 cg26190890 cg11179081	chr6 : 27106988 - chr6 : 27107756	chr6	768	10	0.53065	0.467648	0.503512	0.530672	0.543595	0.54738	0.455906	0.543588
20810	cg25509174 cg19219437 cg21129615 cg05937194 cg04245439 cg19709625 cg25464457 cg10991303 cg06341749	chr3 : 142607511 - chr3 : 142608063	chr3	552	9	0.526134	0.524346	0.448997	0.525873	0.544197	0.511633	0.436414	0.54345
2978	cg14156405 cg21303386 cg13849378 cg24843474 cg07944863	chr1 : 241520286 - chr1 : 241520789	chr1	503	5	0.457548	0.556741	0.524062	0.457526	0.543504	0.536072	0.55726	0.543433
952	cg23989110 cg11592082 cg09230763 cg11705208 cg26038649	chr1 : 27683139 - chr1 : 27683501	chr1	362	5	0.514856	0.490554	0.520681	0.5149	0.541562	0.568908	0.508645	0.541926
3112	cg11799387 cg20335179 cg04006718 cg16884822 cg15538193	chr10 : 1068528 - chr10 : 1068763	chr10	235	5	0.528403	0.519852	0.537653	0.528599	0.541762	0.459756	0.580413	0.541777
16629	cg02683114 cg21239997 cg02115117 cg04609635 cg02315489	chr2 : 24398427 - chr2 : 24398859	chr2	432	5	0.475175	0.515096	0.489965	0.475153	0.541725	0.50999	0.568676	0.541706
16984	cg07393255 cg16368750 cg09012544 cg01717446 cg01579289 cg13686615 cg23045594 cg17332897 cg07358267	chr2 : 71503484 - chr2 : 71504232	chr2	748	9	0.533857	0.501396	0.51538	0.533857	0.540966	0.504215	0.506165	0.540898
30777	cg00573298 cg07458836 cg22961098 cg03465847 cg20332242 cg27522270 cg06309256	chrX : 40594678 - chrX : 40595209	chrX	531	7	0.534206	0.511387	0.507548	0.53414	0.539568	0.495661	0.547213	0.539621
27853	cg19377250 cg00374672 cg19279257 cg26305174 cg04742719 cg01008256 cg12967723 cg21406967	chr7 : 100463206 - chr7 : 100464553	chr7	1347	8	0.48894	0.524891	0.465947	0.488983	0.539575	0.522645	0.522004	0.539585
27634	cg22280038 cg04652097 cg08641579 cg02523844 cg24021956 cg05270344 cg07448060	chr7 : 79083408 - chr7 : 79083753	chr7	345	7	0.526505	0.533115	0.550196	0.526483	0.537665	0.546408	0.52347	0.537712
30059	cg21187068 cg08017634 cg17524265 cg16316162 cg01494348 cg00713939 cg08508337 cg19357499 cg07691531	chr8 : 144659627 - chr8 : 144660659	chr8	1032	9	0.498909	0.511518	0.476156	0.498778	0.537967	0.507646	0.514699	0.537653
5480	cg15556502 cg14416371 cg14944647 cg01939477 cg16407471 cg05376374 cg03365311	chr11 : 43602845 - chr11 : 43602965	chr11	120	7	0.473233	0.52548	0.465881	0.473233	0.537545	0.491721	0.505481	0.537537
2576	cg17178900 cg26354017 cg14159672 cg14893161 cg11965913 cg07167872 cg24503407 cg07157834	chr1 : 205818956 - chr1 : 205819609	chr1	653	8	0.511518	0.484686	0.506806	0.511693	0.537419	0.50235	0.47801	0.537429
15154	cg12134570 cg15013019 cg04432009 cg02011446 cg02964396	chr19 : 13213428 - chr19 : 13213777	chr19	349	5	0.492866	0.490772	0.531392	0.49291	0.536467	0.525422	0.497566	0.536733
7548	cg00108944 cg23588049 cg12351126 cg02415057 cg07311024 cg02071292 cg15942481 cg21272279 cg17050806	chr12 : 75784855 - chr12 : 75785295	chr12	440	9	0.507046	0.513896	0.519154	0.507024	0.536244	0.495614	0.533219	0.536236
27429	cg22281380 cg27006764 cg02204205 cg23104539 cg15774495	chr7 : 50861467 - chr7 : 50861549	chr7	82	5	0.539136	0.542125	0.526418	0.539136	0.536126	0.497339	0.555359	0.53612
29757	cg07223952 cg05590053 cg00394718 cg07532183 cg27310831 cg07651720	chr8 : 120684721 - chr8 : 120685129	chr8	408	6	0.506108	0.519088	0.534511	0.506217	0.535694	0.434538	0.512686	0.535786
2881	cg25850845 cg21440584 cg26032238 cg03318314 cg15987431 cg13652991	chr1 : 231155632 - chr1 : 231155758	chr1	126	6	0.473822	0.498255	0.503294	0.473822	0.535222	0.550667	0.514891	0.53535
6217	cg01149449 cg12841273 cg14697835 cg06892009 cg04983516 cg05218311 cg09673208 cg05099909	chr11 : 79150906 - chr11 : 79151814	chr11	908	8	0.522906	0.517561	0.485886	0.52284	0.53517	0.463879	0.511488	0.535125
21949	cg02468050 cg21187769 cg07733446 cg21852439 cg17198929 cg18629427	chr4 : 93226380 - chr4 : 93226926	chr4	546	6	0.540838	0.500785	0.554952	0.540881	0.534131	0.510038	0.541931	0.534058
20270	cg20191453 cg21926782 cg05924489 cg02251567 cg14184400 cg15246085 cg25021247 cg17877071	chr3 : 49459855 - chr3 : 49460177	chr3	322	8	0.503207	0.486366	0.522186	0.503163	0.534165	0.529907	0.548647	0.53405
10488	cg09490603 cg02916102 cg17588266 cg16332610 cg14855334 cg24578679	chr15 : 74658166 - chr15 : 74658573	chr15	407	6	0.508726	0.474651	0.553949	0.508726	0.533689	0.532817	0.541575	0.533708
24346	cg25863503 cg02773756 cg10608333 cg11744777 cg20633818 cg23730575 cg26075208	chr6 : 27799295 - chr6 : 27799458	chr6	163	7	0.501789	0.518106	0.501963	0.501789	0.533594	0.487256	0.493709	0.53366
13616	cg06594281 cg13424870 cg21306329 cg27619475 cg17733616	chr17 : 73083692 - chr17 : 73083887	chr17	195	5	0.492496	0.50541	0.51911	0.492452	0.533414	0.511598	0.512009	0.533266
1211	cg14207654 cg10511249 cg18153322 cg14780649 cg02431672	chr1 : 43533913 - chr1 : 43534324	chr1	411	5	0.497993	0.439682	0.516252	0.498015	0.533282	0.565964	0.505212	0.533182
16201	cg03612039 cg21117673 cg22411784 cg09555914 cg22806837 cg00757182 cg25344133	chr19 : 58011241 - chr19 : 58011582	chr19	341	7	0.538896	0.523691	0.525633	0.538853	0.533186	0.498322	0.511054	0.533096
20691	cg00112465 cg19611175 cg15087448 cg11641611 cg20506715	chr3 : 128719999 - chr3 : 128720433	chr3	434	5	0.525873	0.520484	0.494241	0.525785	0.532153	0.491907	0.487798	0.532147
1609	cg04158367 cg26027669 cg16297569 cg17858328 cg18182148	chr1 : 92952440 - chr1 : 92952533	chr1	93	5	0.48486	0.527094	0.447971	0.48462	0.532509	0.558202	0.542997	0.532087
21605	cg16701456 cg06093712 cg27438798 cg23584743 cg20393324 cg04808029 cg18894815 cg22777326 cg23466060	chr4 : 13546111 - chr4 : 13546482	chr4	371	9	0.544546	0.48582	0.522295	0.54459	0.531944	0.516449	0.452787	0.531698
1777	cg17908602 cg19319928 cg08846011 cg24635754 cg09313258	chr1 : 117317903 - chr1 : 117318232	chr1	329	5	0.510929	0.494154	0.518608	0.510995	0.531523	0.532583	0.55294	0.531311
26022	cg04152196 cg08109136 cg08378567 cg27306443 cg24283684	chr6 : 136172687 - chr6 : 136172947	chr6	260	5	0.491427	0.524062	0.510558	0.491405	0.530529	0.485667	0.477158	0.530895
15389	cg08173515 cg01527159 cg21651328 cg07800665 cg19211077	chr19 : 21657529 - chr19 : 21658001	chr19	472	5	0.519306	0.469394	0.506392	0.519284	0.530789	0.548496	0.480793	0.530844
24956	cg00179217 cg20383155 cg18363192 cg27347290 cg22753340 cg23174932 cg00397479 cg27084746 cg03587557 cg19738463 cg21116447	chr6 : 31831340 - chr6 : 31831803	chr6	463	11	0.524433	0.531959	0.439943	0.524433	0.530589	0.543851	0.471199	0.530589
4745	cg07908874 cg19495428 cg12275410 cg16284674 cg24424217	chr10 : 135123006 - chr10 : 135123421	chr10	415	5	0.505497	0.486147	0.507701	0.505497	0.53046	0.54294	0.582325	0.53046
11967	cg06602857 cg01145317 cg05555338 cg03366439 cg01695533 cg20368988 cg06999379 cg07769121 cg06675147 cg16630791 cg09586080 cg01142386	chr16 : 86542807 - chr16 : 86543567	chr16	760	12	0.516928	0.469241	0.519415	0.516928	0.530409	0.522097	0.497715	0.530409
1754	cg03614513 cg01522456 cg15558982 cg15685943 cg06043114 cg27442412 cg17131030	chr1 : 115632038 - chr1 : 115632576	chr1	538	7	0.521226	0.523866	0.530039	0.521008	0.53055	0.529898	0.609757	0.530322
8937	cg02676602 cg02810375 cg16264004 cg02347312 cg14114282	chr13 : 113698408 - chr13 : 113698621	chr13	213	5	0.46767	0.509751	0.469677	0.467845	0.529602	0.531325	0.500483	0.529605
451	cg13057898 cg18436788 cg23277830 cg17848003 cg22529645	chr1 : 3703894 - chr1 : 3704559	chr1	665	5	0.531152	0.490031	0.515118	0.53113	0.528819	0.468208	0.527845	0.528979
2643	cg22442454 cg12034118 cg22338127 cg25204440 cg09509183 cg22029157 cg21951975	chr1 : 209979470 - chr1 : 209979733	chr1	263	7	0.534424	0.5149	0.553534	0.534402	0.528345	0.497248	0.537739	0.528293
16002	cg23061046 cg21951729 cg01462607 cg17519645 cg16854917	chr19 : 52206224 - chr19 : 52206691	chr19	467	5	0.536409	0.454101	0.541056	0.536322	0.52839	0.556836	0.538591	0.528229
24656	cg14815183 cg07421969 cg21988950 cg09769113 cg23778358 cg05664039 cg05235884	chr6 : 30131613 - chr6 : 30131806	chr6	193	7	0.504821	0.554734	0.473277	0.504865	0.528159	0.43211	0.557457	0.527199
7684	cg12433395 cg17393917 cg23555120 cg18525352 cg20060685 cg02518216	chr12 : 106533667 - chr12 : 106533903	chr12	236	6	0.498124	0.532024	0.515314	0.498102	0.5269	0.522215	0.615587	0.526846
27123	cg21556281 cg16644023 cg15982700 cg00318947 cg16748008 cg16406967 cg18680977 cg04351734 cg22798849	chr7 : 27154720 - chr7 : 27155234	chr7	514	9	0.513111	0.515009	0.531654	0.513111	0.525598	0.557141	0.554893	0.525215
6400	cg01161204 cg02256049 cg21540621 cg16675758 cg12341202	chr11 : 115530932 - chr11 : 115531299	chr11	367	5	0.546597	0.537849	0.538503	0.546597	0.52511	0.462458	0.539903	0.52511
21816	cg25456368 cg00019495 cg04085076 cg06771126 cg00493422	chr4 : 57547347 - chr4 : 57547872	chr4	525	5	0.505694	0.47236	0.511431	0.505781	0.524542	0.511718	0.533533	0.524754
20430	cg12417685 cg12219082 cg09868336 cg12412079 cg13921352 cg20375342 cg05893614	chr3 : 68981852 - chr3 : 68981956	chr3	104	7	0.507024	0.494873	0.525458	0.507046	0.522922	0.502418	0.538371	0.522991
9197	cg01794426 cg10741025 cg24066316 cg05842348 cg11091113 cg01803925	chr14 : 37132490 - chr14 : 37133285	chr14	795	6	0.49507	0.470092	0.527334	0.495157	0.522591	0.503211	0.520937	0.522676
19790	cg13521944 cg14696444 cg21407354 cg08378742 cg13766329 cg02144647 cg05345310	chr22 : 45596948 - chr22 : 45597035	chr22	87	7	0.511497	0.510908	0.499346	0.511497	0.522245	0.544328	0.463626	0.52209
1205	cg07515989 cg24634568 cg18391694 cg27232866 cg19254906	chr1 : 43250763 - chr1 : 43251253	chr1	490	5	0.462173	0.493237	0.459948	0.462173	0.521758	0.525127	0.536131	0.521796
24983	cg24508713 cg11953311 cg24051943 cg25804044 cg17810099	chr6 : 31870783 - chr6 : 31870990	chr6	207	5	0.504603	0.510253	0.482897	0.504603	0.521644	0.519414	0.458071	0.521644
22346	cg18086520 cg07272677 cg00028336 cg16433265 cg11956467	chr4 : 186741362 - chr4 : 186742139	chr4	777	5	0.464223	0.514682	0.495768	0.464267	0.52153	0.545707	0.57777	0.521575
21000	cg24529771 cg01271129 cg19436429 cg25262361 cg09342567	chr3 : 178978849 - chr3 : 178979013	chr3	164	5	0.50445	0.505279	0.492059	0.50445	0.521044	0.521582	0.585397	0.521068
20175	cg08882707 cg15444560 cg27266250 cg22830844 cg17339956	chr3 : 44283283 - chr3 : 44283355	chr3	72	5	0.498691	0.512827	0.481741	0.498517	0.520284	0.532049	0.495568	0.520176
24832	cg23354933 cg18892128 cg01290934 cg22809408 cg18086664	chr6 : 31409572 - chr6 : 31409706	chr6	134	5	0.508333	0.496379	0.495353	0.508442	0.519552	0.562724	0.489784	0.519157
18170	cg12901733 cg01705005 cg13349742 cg20660350 cg18282441	chr2 : 235079808 - chr2 : 235080382	chr2	574	5	0.477945	0.506959	0.503534	0.477901	0.518583	0.574934	0.522466	0.518867
22227	cg16691177 cg25147158 cg05767411 cg13023646 cg14038058 cg11512289 cg25219188 cg11955878	chr4 : 165898666 - chr4 : 165898967	chr4	301	8	0.50541	0.493674	0.496051	0.505432	0.518225	0.54288	0.477246	0.518261
15377	cg20126635 cg10200255 cg15201536 cg22582862 cg25973895 cg16008616	chr19 : 20162642 - chr19 : 20163138	chr19	496	6	0.51202	0.493674	0.519786	0.512086	0.517579	0.527476	0.527237	0.517543
15962	cg24092179 cg13403724 cg15007959 cg15690347 cg22745102 cg04508467	chr19 : 50931222 - chr19 : 50931622	chr19	400	6	0.511606	0.511649	0.517343	0.511649	0.517402	0.50678	0.541275	0.517317
17533	cg11752586 cg05975727 cg26323130 cg14986699 cg17245188	chr2 : 149632599 - chr2 : 149632709	chr2	110	5	0.491907	0.514092	0.500131	0.491819	0.51732	0.498335	0.398018	0.517264
29699	cg24098951 cg08517286 cg04413895 cg01675814 cg00662122	chr8 : 105601036 - chr8 : 105601696	chr8	660	5	0.562631	0.544415	0.566536	0.562653	0.516651	0.498356	0.524521	0.516918
10677	cg02276973 cg22460443 cg08001256 cg07315755 cg07353895	chr15 : 90610486 - chr15 : 90611758	chr15	1272	5	0.502291	0.485013	0.504341	0.502291	0.516648	0.529416	0.51301	0.516877
10806	cg05881135 cg16107285 cg27569300 cg09948076 cg10637512 cg01348004 cg21084284 cg02015876	chr15 : 99644973 - chr15 : 99645435	chr15	462	8	0.529363	0.501985	0.532657	0.529385	0.516319	0.529767	0.576586	0.516464
23258	cg16265906 cg12880658 cg16707405 cg02792792 cg14470895 cg23180938 cg08516516 cg11036833	chr5 : 115152326 - chr5 : 115152494	chr5	168	8	0.530912	0.495659	0.517517	0.530934	0.516121	0.510276	0.497964	0.516241
3672	cg18956393 cg09465786 cg08812555 cg25751172 cg01160882	chr10 : 54074524 - chr10 : 54075082	chr10	558	5	0.501832	0.545004	0.528665	0.501767	0.516085	0.505849	0.545849	0.51583
26884	cg15319585 cg07005020 cg09404689 cg07829265 cg01792229	chr7 : 4307392 - chr7 : 4308327	chr7	935	5	0.508879	0.568216	0.456283	0.509097	0.514897	0.51633	0.422794	0.514905
1149	cg05720261 cg23037132 cg17449954 cg17602126 cg12160637 cg06154570	chr1 : 40105304 - chr1 : 40105764	chr1	460	6	0.486671	0.498102	0.502225	0.487151	0.514336	0.558805	0.534454	0.514902
24405	cg11414709 cg19085712 cg01984858 cg15051226 cg09764408 cg18109777 cg27136241 cg07160574	chr6 : 28555055 - chr6 : 28555230	chr6	175	8	0.51983	0.508573	0.500502	0.51983	0.514689	0.475725	0.417374	0.514748
3687	cg06373764 cg27346088 cg16430909 cg20156450 cg10845249	chr10 : 61469820 - chr10 : 61469980	chr10	160	5	0.51298	0.511017	0.52692	0.513089	0.514968	0.523108	0.563118	0.514426
15541	cg27326856 cg03524308 cg01331105 cg12182940 cg10911660 cg03163944 cg10661724 cg09466465 cg20981058 cg11967894	chr19 : 37663410 - chr19 : 37663781	chr19	371	10	0.517125	0.509468	0.510668	0.517125	0.514434	0.485073	0.452324	0.514396
19821	cg04329382 cg03412618 cg10352237 cg21094022 cg09328012 cg26422762 cg20076516 cg24731441 cg11383208 cg21450723 cg07546360	chr22 : 46480891 - chr22 : 46482023	chr22	1132	11	0.477356	0.49267	0.495288	0.477356	0.514438	0.468625	0.471133	0.514316
2366	cg17237951 cg27473416 cg00579423 cg03058232 cg22776392	chr1 : 180922636 - chr1 : 180923569	chr1	933	5	0.507046	0.468085	0.529843	0.507046	0.514214	0.541344	0.52326	0.514214
17334	cg21482265 cg12889195 cg11763394 cg21550016 cg07772999 cg19083407 cg07594247 cg17445212 cg21610815	chr2 : 113992762 - chr2 : 113994035	chr2	1273	9	0.456239	0.509402	0.473582	0.456283	0.513662	0.563283	0.533106	0.513718
16891	cg15732840 cg19177627 cg15402210 cg17583946 cg20585676 cg01156077 cg06528559 cg27344587 cg18126442 cg13433250 cg00445126 cg22197050 cg06192497 cg02606403	chr2 : 63274615 - chr2 : 63276268	chr2	1653	14	0.531654	0.475916	0.517823	0.531719	0.513217	0.51831	0.465297	0.513427
28066	cg04528819 cg20426994 cg00094518 cg09823095 cg25109431 cg21449170 cg05651960 cg18751682 cg14361627 cg08097417 cg09499629 cg07955995 cg22285878	chr7 : 130418315 - chr7 : 130419173	chr7	858	13	0.513765	0.54243	0.527596	0.513765	0.512765	0.492866	0.542855	0.512739
28484	cg07910560 cg00099393 cg11318054 cg21606115 cg08022244	chr7 : 157361396 - chr7 : 157361759	chr7	363	5	0.507439	0.49387	0.533202	0.507461	0.512426	0.525999	0.570281	0.512421
29087	cg16175263 cg23831143 cg27090216 cg08309809 cg23965061 cg14015044 cg26029345	chr8 : 22960385 - chr8 : 22960820	chr8	435	7	0.461126	0.476723	0.47644	0.461344	0.511439	0.544573	0.500467	0.512188
16162	cg09568464 cg02763101 cg22647407 cg08464824 cg13916740 cg24039631 cg20984085 cg25267765	chr19 : 56904901 - chr19 : 56905094	chr19	193	8	0.482548	0.440467	0.451963	0.48257	0.512111	0.543506	0.516883	0.511966
19598	cg03214697 cg00093544 cg02923264 cg03014622 cg19964641 cg15829116 cg07217063	chr22 : 30901532 - chr22 : 30901886	chr22	354	7	0.494699	0.510842	0.515314	0.494721	0.510298	0.525747	0.547637	0.510414
24611	cg03343571 cg13185413 cg06249604 cg09279736 cg07382347 cg13401893 cg12633154 cg10568066 cg16078649 cg10930308 cg02188185 cg07179033	chr6 : 30039175 - chr6 : 30039548	chr6	373	12	0.51743	0.514682	0.482112	0.517517	0.508001	0.549138	0.488863	0.507909
18987	cg25325053 cg14115220 cg20895028 cg24607535 cg16518142	chr20 : 58533022 - chr20 : 58533713	chr20	691	5	0.466536	0.500807	0.498015	0.466492	0.507357	0.584877	0.595443	0.507243
6306	cg03243226 cg15603568 cg23559689 cg00343633 cg03225817 cg04747226 cg07972135 cg21217024 cg19343464	chr11 : 105480979 - chr11 : 105481509	chr11	530	9	0.499149	0.541187	0.46719	0.499149	0.506669	0.53307	0.4357	0.50671
12811	cg11346248 cg21697381 cg19566405 cg05174890 cg10431713 cg20354552 cg08330690	chr17 : 33759929 - chr17 : 33760293	chr17	364	7	0.501331	0.452182	0.510558	0.501309	0.506716	0.537463	0.535048	0.506705
23261	cg05931423 cg11312495 cg15203566 cg01145903 cg14720024	chr5 : 115697214 - chr5 : 115697696	chr5	482	5	0.502705	0.464289	0.515161	0.502749	0.506496	0.535566	0.532354	0.506485
17146	cg24161793 cg06909469 cg18720905 cg17932631 cg05497345 cg13997864 cg11270393 cg08983217	chr2 : 96990762 - chr2 : 96991149	chr2	387	8	0.499084	0.468957	0.513373	0.499106	0.50606	0.56493	0.545972	0.506036
11447	cg04640675 cg00381755 cg19622714 cg00301396 cg05308504	chr16 : 30572739 - chr16 : 30573013	chr16	274	5	0.490292	0.514791	0.515096	0.490314	0.506013	0.494363	0.570975	0.506016
12936	cg03085312 cg08332908 cg09858022 cg22935450 cg03053374 cg00236832 cg26654286	chr17 : 38465281 - chr17 : 38465510	chr17	229	7	0.519677	0.501571	0.533442	0.519743	0.505621	0.567408	0.543558	0.505997
4577	cg01458105 cg19754622 cg16106427 cg25969878 cg00468125 cg18233544	chr10 : 134045514 - chr10 : 134046237	chr10	723	6	0.450807	0.510733	0.477269	0.450894	0.506013	0.466031	0.588788	0.505988
24635	cg20167366 cg14645861 cg06893296 cg12860635 cg25247859 cg05745631 cg05068206 cg23079252 cg21334513 cg27282900 cg02049405 cg21697794 cg26477792 cg06938705 cg04768479 cg18628732 cg17034390 cg05994850 cg26719062 cg18055610 cg19059495 cg01964152 cg08548396 cg12534216 cg01528052 cg27108419 cg08498156	chr6 : 30094980 - chr6 : 30095802	chr6	822	27	0.504756	0.484991	0.527356	0.504756	0.505576	0.59851	0.524384	0.505576
24520	cg15242223 cg03639249 cg20704972 cg12867320 cg20496034 cg02928278 cg24640415 cg19372359 cg18116160	chr6 : 29573377 - chr6 : 29575145	chr6	1768	9	0.490641	0.491252	0.526418	0.490663	0.504817	0.545755	0.596096	0.504722
19914	cg18277764 cg21145524 cg04748834 cg19505136 cg10603275 cg03940684	chr3 : 239188 - chr3 : 239733	chr3	545	6	0.517103	0.536976	0.516558	0.517038	0.503864	0.499061	0.534686	0.503911
13044	cg25067162 cg26276233 cg06001716 cg02286533 cg14947218 cg16006004 cg18372208 cg14687474 cg25288140	chr17 : 41277974 - chr17 : 41278341	chr17	367	9	0.495659	0.557941	0.485558	0.495768	0.503734	0.539633	0.526861	0.503529
25709	cg17188169 cg03669949 cg12045875 cg06797068 cg08124399	chr6 : 74104388 - chr6 : 74104868	chr6	480	5	0.533704	0.557308	0.527923	0.533748	0.50308	0.523605	0.580336	0.503069
1478	cg10128416 cg21906852 cg09502221 cg26855724 cg02709834 cg26690034 cg26752657 cg21535942 cg00121533	chr1 : 75198403 - chr1 : 75199117	chr1	714	9	0.483791	0.516099	0.491819	0.483682	0.502916	0.499543	0.444227	0.502655
21688	cg03423497 cg25940248 cg12523932 cg13732582 cg06235390 cg19786733	chr4 : 39448432 - chr4 : 39449130	chr4	698	6	0.456392	0.488962	0.523233	0.456348	0.502168	0.549572	0.493153	0.502236
17723	cg01749491 cg11359133 cg14118515 cg15133351 cg07411620	chr2 : 176948693 - chr2 : 176948759	chr2	66	5	0.44712	0.538176	0.486933	0.44712	0.502109	0.47657	0.502042	0.502109
24913	cg08021615 cg25845158 cg26978172 cg09632273 cg01066220 cg26111283 cg08509383 cg16359915 cg19008099 cg23348155 cg14293129 cg25095032 cg04074004 cg00941576 cg14016554 cg04161526	chr6 : 31696161 - chr6 : 31696519	chr6	358	16	0.473386	0.509184	0.497666	0.473451	0.501388	0.486193	0.49625	0.501414
8525	cg27360326 cg19712603 cg22763718 cg17535595 cg03315215 cg16027761 cg24560494 cg01382137	chr13 : 53422691 - chr13 : 53423078	chr13	387	8	0.486867	0.518783	0.4738	0.486846	0.501253	0.52583	0.436932	0.501226
15554	cg25875213 cg04784475 cg22521696 cg03611452 cg25324105 cg14587524	chr19 : 38183055 - chr19 : 38183262	chr19	207	6	0.510493	0.462805	0.515947	0.510493	0.501119	0.525616	0.472998	0.501105
16820	cg20881074 cg03310469 cg15554875 cg08751472 cg02004418 cg24347594	chr2 : 45236659 - chr2 : 45236743	chr2	84	6	0.531741	0.520724	0.485929	0.531675	0.499998	0.519199	0.503134	0.500166
2079	cg24361162 cg09989644 cg12062819 cg23842796 cg20433275	chr1 : 156358116 - chr1 : 156358408	chr1	292	5	0.488438	0.491056	0.48209	0.488416	0.499549	0.505825	0.476643	0.49964
23624	cg04675542 cg02343823 cg08580836 cg19014419 cg21521779 cg11291313 cg18237551	chr5 : 150284416 - chr5 : 150284600	chr5	184	7	0.528665	0.495986	0.498473	0.52873	0.499245	0.53711	0.479563	0.499096
15904	cg04113418 cg04781584 cg03559454 cg13484549 cg00421363	chr19 : 49646093 - chr19 : 49646246	chr19	153	5	0.472949	0.519721	0.490467	0.473037	0.498263	0.516397	0.52602	0.498523
15206	cg18580265 cg05488632 cg17476026 cg17399362 cg16184495 cg15826897 cg19744936	chr19 : 15343170 - chr19 : 15343395	chr19	225	7	0.498102	0.472513	0.513024	0.498386	0.498126	0.519137	0.566277	0.497971
12548	cg25964007 cg12610887 cg09858237 cg13386351 cg23980468 cg24089133 cg13050981 cg04420907	chr17 : 9479910 - chr17 : 9480215	chr17	305	8	0.475196	0.495332	0.490096	0.475262	0.496831	0.462125	0.471874	0.497066
17120	cg24746100 cg19544662 cg23539933 cg02884176 cg08871855 cg23511613	chr2 : 88751786 - chr2 : 88752322	chr2	536	6	0.493914	0.48486	0.478818	0.493848	0.496487	0.531301	0.492308	0.496361
16540	cg01384111 cg15707428 cg13808071 cg14653284 cg11534680 cg17208060	chr2 : 11679605 - chr2 : 11680086	chr2	481	6	0.518499	0.440794	0.505825	0.518477	0.495982	0.551794	0.547417	0.495894
16190	cg19568003 cg18644286 cg26332114 cg19603903 cg23371413 cg06643849 cg25432232 cg22711741	chr19 : 57742217 - chr19 : 57742444	chr19	227	8	0.529756	0.503272	0.527531	0.529734	0.495696	0.526981	0.555593	0.495787
8451	cg23483707 cg27366862 cg00146695 cg00423124 cg14210620 cg19180546	chr13 : 44453835 - chr13 : 44453867	chr13	32	6	0.489725	0.500654	0.488329	0.489638	0.495309	0.477993	0.48266	0.495705
27069	cg09333471 cg00473134 cg03995857 cg07320646 cg07293520 cg04770504 cg24805239	chr7 : 24796355 - chr7 : 24797486	chr7	1131	7	0.478599	0.524258	0.500545	0.478599	0.495013	0.562139	0.509964	0.495013
11693	cg08659394 cg05527491 cg06212637 cg20984188 cg02771381 cg02724047	chr16 : 67184918 - chr16 : 67185194	chr16	276	6	0.514289	0.506152	0.522884	0.514158	0.49431	0.546027	0.553949	0.494558
13942	cg07656922 cg02339793 cg23939642 cg26726230 cg19776793	chr17 : 79225309 - chr17 : 79225974	chr17	665	5	0.524389	0.492059	0.512631	0.524411	0.493833	0.474116	0.551994	0.493893
6327	cg07059925 cg21560076 cg14140118 cg16934235 cg23322223 cg23755074	chr11 : 108422936 - chr11 : 108423325	chr11	389	6	0.540271	0.451636	0.533595	0.540271	0.493064	0.575133	0.57587	0.493064
25273	cg08088295 cg17833071 cg13524302 cg02662362 cg24465429 cg24266485	chr6 : 33084741 - chr6 : 33084840	chr6	99	6	0.49507	0.514682	0.497273	0.49507	0.492976	0.517461	0.569775	0.492987
26732	cg06927900 cg27643890 cg12946440 cg12967164 cg21422016	chr7 : 1753447 - chr7 : 1753659	chr7	212	5	0.507134	0.503141	0.51839	0.507134	0.492781	0.53076	0.558448	0.492797
22928	cg18260625 cg03780132 cg27605748 cg13864319 cg17757602 cg01366595 cg15936446	chr5 : 42951192 - chr5 : 42952369	chr5	1177	7	0.527138	0.496161	0.499127	0.527094	0.492402	0.556045	0.44711	0.492299
11472	cg15468095 cg12100791 cg09115984 cg02900356 cg01059100	chr16 : 31214401 - chr16 : 31214607	chr16	206	5	0.482308	0.521335	0.468237	0.482308	0.492186	0.507751	0.45303	0.492186
13594	cg01944585 cg23838375 cg09852601 cg10817887 cg05100739 cg19445996 cg04028224 cg18493981	chr17 : 72732912 - chr17 : 72733183	chr17	271	8	0.522818	0.518216	0.482199	0.52284	0.492555	0.495092	0.42586	0.49201
16459	cg24215159 cg19006220 cg00217080 cg16721427 cg15375488	chr2 : 4050695 - chr2 : 4050845	chr2	150	5	0.476745	0.559053	0.477072	0.476767	0.491939	0.554279	0.426875	0.491942
25406	cg19735538 cg04329454 cg01392313 cg06289138 cg08301503	chr6 : 33560953 - chr6 : 33561188	chr6	235	5	0.45901	0.467932	0.458508	0.458944	0.490958	0.54697	0.504782	0.490966
8401	cg12369353 cg18282455 cg02235562 cg16068263 cg02727104	chr13 : 36728963 - chr13 : 36729247	chr13	284	5	0.527596	0.512478	0.514114	0.527552	0.490765	0.529106	0.454211	0.490607
429	cg14781922 cg10143426 cg20677901 cg00565688 cg00295572 cg01915516 cg17496659	chr1 : 3568124 - chr1 : 3568245	chr1	121	7	0.49171	0.48486	0.539202	0.491623	0.49025	0.546927	0.57959	0.490055
13202	cg02422694 cg19081437 cg26327071 cg24114154 cg12806763 cg21460081	chr17 : 46655790 - chr17 : 46656012	chr17	222	6	0.447666	0.53678	0.431981	0.447731	0.489275	0.522272	0.459545	0.489644
25659	cg07267782 cg05155704 cg19716238 cg04690482 cg18532076 cg21227040	chr6 : 54711227 - chr6 : 54711429	chr6	202	6	0.510515	0.511758	0.535079	0.510493	0.489192	0.512405	0.518241	0.489201
12743	cg08217285 cg12080909 cg21468728 cg20300175 cg16755500	chr17 : 27917879 - chr17 : 27918338	chr17	459	5	0.490794	0.53449	0.470855	0.490838	0.488564	0.491219	0.470763	0.488649
25084	cg19268434 cg13720581 cg26939195 cg04846781 cg18417373 cg09114581	chr6 : 32076967 - chr6 : 32077103	chr6	136	6	0.487173	0.518805	0.501287	0.487151	0.488408	0.516917	0.513963	0.488414
2035	cg04995846 cg22018051 cg12473916 cg16254756 cg19356022 cg25603883	chr1 : 154943300 - chr1 : 154944357	chr1	1057	6	0.513809	0.528098	0.500175	0.513831	0.488386	0.464039	0.495805	0.488379
25937	cg15244223 cg18313899 cg13323701 cg02330121 cg04442576 cg11430157 cg26532358	chr6 : 118228493 - chr6 : 118228871	chr6	378	7	0.506283	0.511867	0.531043	0.506086	0.488609	0.491279	0.560341	0.488333
9200	cg01168865 cg07535928 cg25051529 cg03611555 cg23291305	chr14 : 37641261 - chr14 : 37641726	chr14	465	5	0.524411	0.50925	0.558944	0.524346	0.487844	0.498416	0.567652	0.487946
3098	cg08079763 cg04720116 cg03559389 cg25297146 cg08324703	chr10 : 679171 - chr10 : 679514	chr10	343	5	0.531523	0.45829	0.543346	0.531566	0.486861	0.535359	0.519623	0.487432
10452	cg12593608 cg08331842 cg22062265 cg18093693 cg13587740 cg20540327	chr15 : 72668042 - chr15 : 72668275	chr15	233	6	0.474847	0.482155	0.49291	0.474716	0.487428	0.490488	0.512983	0.487405
6403	cg24266670 cg12918457 cg13839457 cg01033865 cg15630907 cg05578358	chr11 : 115630629 - chr11 : 115631100	chr11	471	6	0.501723	0.523037	0.516601	0.501789	0.486853	0.505143	0.552253	0.486708
18761	cg20529070 cg10360552 cg18911945 cg01877937 cg08633313	chr20 : 42142751 - chr20 : 42142852	chr20	101	5	0.47356	0.517605	0.503316	0.473604	0.486173	0.512549	0.489443	0.486219
27089	cg08767938 cg07184013 cg25771013 cg03853208 cg16291657 cg09596116	chr7 : 25989524 - chr7 : 25990026	chr7	502	6	0.470986	0.511213	0.483399	0.47103	0.485985	0.474892	0.477481	0.48611
12636	cg22395355 cg09103877 cg10868156 cg24287175 cg15696816	chr17 : 17713061 - chr17 : 17713886	chr17	825	5	0.480934	0.53329	0.466143	0.480955	0.485537	0.493622	0.43604	0.485597
7678	cg16182707 cg04892391 cg21331473 cg20234947 cg22974804 cg07456485	chr12 : 105478090 - chr12 : 105478419	chr12	329	6	0.485079	0.506305	0.490881	0.484991	0.484986	0.478746	0.52024	0.48526
21063	cg21685266 cg03414569 cg19536404 cg02738081 cg11806102 cg07884734	chr3 : 184971652 - chr3 : 184972088	chr3	436	6	0.506348	0.501505	0.472186	0.506326	0.485388	0.490522	0.487548	0.485119
12370	cg23770271 cg24738036 cg17074014 cg13984928 cg20765716	chr17 : 3704471 - chr17 : 3704602	chr17	131	5	0.493783	0.51202	0.475764	0.493957	0.485022	0.493215	0.438939	0.485098
28282	cg12433277 cg17362861 cg24068372 cg10770742 cg21532325 cg16482474 cg00878038	chr7 : 151106990 - chr7 : 151107807	chr7	817	7	0.516339	0.471161	0.529821	0.516361	0.484925	0.562492	0.575628	0.484938
14701	cg24467387 cg20675971 cg08286551 cg22783058 cg27409514	chr19 : 1168354 - chr19 : 1169138	chr19	784	5	0.526854	0.469743	0.525742	0.526854	0.484551	0.525861	0.42843	0.484551
782	cg16491362 cg09356672 cg05348366 cg04928049 cg15676500 cg10970798 cg25141181	chr1 : 19665070 - chr1 : 19665757	chr1	687	7	0.483312	0.511475	0.515576	0.483202	0.484602	0.505735	0.549802	0.484434
3464	cg13135459 cg20453969 cg16023943 cg15469871 cg03848129 cg20377766	chr10 : 27541298 - chr10 : 27541877	chr10	579	6	0.510689	0.502705	0.514878	0.510668	0.484335	0.520219	0.543626	0.484183
25340	cg19356389 cg26106778 cg06363559 cg11011640 cg18486707	chr6 : 33175140 - chr6 : 33175225	chr6	85	5	0.490249	0.494699	0.504341	0.490292	0.483286	0.473775	0.484933	0.483244
1320	cg26560222 cg06921573 cg11448896 cg00152008 cg13210260 cg19380001 cg10776919 cg27265170	chr1 : 50888826 - chr1 : 50889510	chr1	684	8	0.507723	0.488351	0.514005	0.507788	0.482975	0.515556	0.477685	0.483013
18542	cg21856067 cg04624110 cg01552272 cg23169957 cg25557432 cg04716990 cg06571075 cg26059153 cg23751724 cg07953890 cg03874229	chr20 : 13975853 - chr20 : 13976839	chr20	986	11	0.504603	0.558791	0.532723	0.504494	0.482305	0.584141	0.496225	0.482253
25789	cg08734918 cg08001895 cg02168857 cg06740629 cg21552709	chr6 : 94129481 - chr6 : 94129636	chr6	155	5	0.494764	0.492059	0.508159	0.494721	0.481733	0.539602	0.560194	0.481782
23747	cg02320083 cg11620716 cg07871442 cg10881242 cg01354046	chr5 : 171057072 - chr5 : 171057339	chr5	267	5	0.510362	0.496531	0.540358	0.510318	0.4804	0.532528	0.514195	0.4803
23452	cg19876814 cg02051771 cg01202150 cg00275741 cg25967418 cg26556719 cg22150440	chr5 : 140261653 - chr5 : 140261930	chr5	277	7	0.487129	0.485122	0.493128	0.487129	0.480228	0.506715	0.482113	0.48021
20018	cg19392656 cg16604516 cg17561417 cg18603228 cg01896761 cg18406197	chr3 : 13590415 - chr3 : 13590450	chr3	35	6	0.514834	0.481065	0.512195	0.514834	0.480167	0.508333	0.457725	0.480146
5431	cg23988359 cg18950102 cg07920148 cg06224751 cg05951864 cg04642923	chr11 : 33397679 - chr11 : 33398366	chr11	687	6	0.499302	0.491383	0.504494	0.499149	0.480246	0.505782	0.520494	0.480115
24997	cg12456973 cg15063771 cg19864808 cg15965006 cg05626376 cg26837372 cg01883966 cg24870273 cg23945481 cg17339327 cg12776033 cg26029547 cg16190718 cg23906067	chr6 : 31938744 - chr6 : 31939112	chr6	368	14	0.48486	0.537282	0.530366	0.48486	0.479956	0.510628	0.568107	0.479995
5466	cg07136133 cg00220721 cg22117805 cg18520238 cg08943494	chr11 : 36422377 - chr11 : 36422615	chr11	238	5	0.497426	0.459228	0.521291	0.497426	0.479922	0.542975	0.560827	0.479797
16042	cg10332700 cg15202738 cg02886522 cg26087117 cg24892510	chr19 : 53636077 - chr19 : 53636309	chr19	232	5	0.455083	0.507962	0.484402	0.455017	0.479601	0.529134	0.451186	0.479579
4362	cg08218734 cg00500564 cg06525651 cg03242819 cg03070297 cg12204732 cg25984344 cg03129384 cg18368487	chr10 : 128993810 - chr10 : 128994702	chr10	892	9	0.522142	0.543521	0.514791	0.522142	0.47948	0.539574	0.529574	0.479353
236	cg20430847 cg09827752 cg17755964 cg01116067 cg06839900 cg15923947	chr1 : 2461820 - chr1 : 2461929	chr1	109	6	0.511278	0.465314	0.521466	0.5113	0.477981	0.586776	0.525772	0.478928
15538	cg15746891 cg21292152 cg03584288 cg02370417 cg24052101 cg15322783 cg21761844 cg02459604 cg03060201 cg26612849 cg03443751	chr19 : 37406932 - chr19 : 37407462	chr19	530	11	0.550938	0.463264	0.517976	0.550938	0.478248	0.551697	0.429201	0.478248
21872	cg04810284 cg19566906 cg08655871 cg20137991 cg13551535	chr4 : 79971177 - chr4 : 79971462	chr4	285	5	0.513962	0.52969	0.502945	0.514027	0.476969	0.553922	0.493101	0.477281
531	cg02084087 cg15205428 cg11756870 cg10059687 cg03893150 cg23114616	chr1 : 6526049 - chr1 : 6526398	chr1	349	6	0.51887	0.501527	0.490707	0.51887	0.476518	0.466055	0.481676	0.476486
21179	cg00190795 cg20092936 cg21553700 cg08767936 cg01792640 cg08048178	chr3 : 195599898 - chr3 : 195601155	chr3	1257	6	0.519939	0.43209	0.468783	0.519895	0.476065	0.543736	0.424505	0.476273
1185	cg09588555 cg00385863 cg08462924 cg03893446 cg00290994 cg11828180	chr1 : 41847668 - chr1 : 41848985	chr1	1317	6	0.462718	0.477334	0.471226	0.462653	0.476204	0.58997	0.502164	0.476062
20677	cg02436004 cg16674492 cg06490988 cg22122410 cg19638477 cg13483882	chr3 : 128211540 - chr3 : 128212476	chr3	936	6	0.479581	0.431217	0.503687	0.479647	0.47457	0.529804	0.426541	0.474545
23760	cg18440230 cg12355887 cg24699021 cg16119483 cg16345114 cg21204530	chr5 : 172305889 - chr5 : 172306136	chr5	247	6	0.460057	0.500393	0.491012	0.4601	0.47417	0.546756	0.496486	0.474181
13933	cg08380391 cg24924502 cg16067628 cg00591333 cg02271139	chr17 : 79109729 - chr17 : 79110023	chr17	294	5	0.478403	0.450414	0.478752	0.478425	0.473494	0.514581	0.532436	0.473546
21836	cg02117721 cg10728756 cg24765658 cg24774306 cg25432696	chr4 : 74702421 - chr4 : 74702728	chr4	307	5	0.514616	0.500196	0.511889	0.51466	0.473281	0.469963	0.515749	0.473319
27402	cg06347454 cg07045469 cg02497785 cg07703976 cg15382258 cg01939522	chr7 : 48494519 - chr7 : 48495157	chr7	638	6	0.511606	0.506763	0.539616	0.511453	0.472239	0.544281	0.557245	0.47179
1776	cg23304296 cg07822305 cg17179875 cg15572086 cg07220554	chr1 : 116961183 - chr1 : 116961464	chr1	281	5	0.510013	0.493434	0.5024	0.510166	0.47073	0.483503	0.502364	0.470732
4127	cg25250998 cg16071118 cg07217928 cg13332774 cg06776915 cg15410903 cg02105002	chr10 : 106028373 - chr10 : 106028928	chr10	555	7	0.514769	0.509904	0.525524	0.514878	0.469766	0.520233	0.508006	0.469909
30968	cg21966410 cg12589433 cg18156601 cg17964359 cg05019001 cg07780118	chrX : 66765882 - chrX : 66766506	chrX	624	6	0.51106	0.497033	0.499891	0.511104	0.469499	0.518575	0.512352	0.469625
7331	cg04710764 cg21623748 cg03556393 cg08737755 cg16253259 cg25057269	chr12 : 54378736 - chr12 : 54378826	chr12	90	6	0.458333	0.497622	0.461126	0.458333	0.469652	0.537174	0.495732	0.469539
17010	cg05053562 cg16236766 cg02884775 cg16877924 cg12529672 cg14775207 cg23237183 cg02344895 cg14998651 cg08430329	chr2 : 73429308 - chr2 : 73430374	chr2	1066	10	0.518608	0.526047	0.48798	0.518608	0.468853	0.553031	0.457123	0.468935
25448	cg25658385 cg27321913 cg05583848 cg10418263 cg07294541 cg13425174 cg03355690 cg14960043 cg00237391 cg02927327	chr6 : 35265341 - chr6 : 35265759	chr6	418	10	0.447469	0.437456	0.437413	0.447557	0.468958	0.562568	0.508968	0.468904
27664	cg16772035 cg00141548 cg09105881 cg16288248 cg27507700 cg00862116	chr7 : 87229880 - chr7 : 87230344	chr7	464	6	0.438089	0.546335	0.478316	0.438089	0.466785	0.536138	0.449685	0.466764
12451	cg05940703 cg15639045 cg03892045 cg03712541 cg13181928 cg07011163 cg08352268 cg18530716	chr17 : 6947032 - chr17 : 6947403	chr17	371	8	0.507962	0.496335	0.50373	0.508028	0.466115	0.539888	0.510648	0.466374
5833	cg03196265 cg26230076 cg11493197 cg25153976 cg25987171	chr11 : 64937570 - chr11 : 64937664	chr11	94	5	0.492648	0.517277	0.503141	0.49267	0.465823	0.513841	0.535927	0.46598
11338	cg16426482 cg05949903 cg07070305 cg05988267 cg06970228	chr16 : 21831587 - chr16 : 21831943	chr16	356	5	0.471466	0.512893	0.487893	0.471335	0.465885	0.475451	0.490577	0.465756
7608	cg11225410 cg22125370 cg04797323 cg11738543 cg23412850 cg07687131 cg06630241	chr12 : 93966317 - chr12 : 93967711	chr12	1394	7	0.48017	0.561082	0.494655	0.480127	0.465114	0.492763	0.535016	0.46523
15533	cg09669356 cg21838880 cg20680754 cg26613140 cg15131414 cg11419456 cg00498155 cg08066844 cg02306127 cg10134141 cg27545919	chr19 : 37157565 - chr19 : 37157995	chr19	430	11	0.460646	0.500218	0.529014	0.460624	0.464103	0.511912	0.508595	0.464073
24770	cg15848685 cg12457901 cg16958594 cg15978899 cg00933603	chr6 : 30882641 - chr6 : 30883001	chr6	360	5	0.566754	0.516034	0.526025	0.566754	0.462966	0.49636	0.536007	0.463045
24120	cg02407720 cg13486532 cg10293403 cg22267770 cg20148850 cg05224741	chr6 : 10421372 - chr6 : 10422322	chr6	950	6	0.474062	0.44712	0.535733	0.474084	0.462707	0.561172	0.543809	0.462747
29571	cg22289837 cg12264626 cg13721134 cg05355225 cg18674980 cg07560510 cg17480760 cg10184889 cg21172458 cg08582356 cg21346043 cg22927247	chr8 : 86350278 - chr8 : 86351195	chr8	917	12	0.495266	0.468761	0.49363	0.495201	0.461866	0.575915	0.481926	0.461904
6062	cg04495670 cg06329574 cg15119027 cg24359323 cg15554555 cg15337897 cg24795627	chr11 : 69634296 - chr11 : 69634456	chr11	160	7	0.458399	0.535755	0.445375	0.458464	0.461981	0.533421	0.399389	0.46186
3805	cg12864721 cg23657179 cg15182635 cg00082939 cg01107874 cg19057830	chr10 : 77164987 - chr10 : 77165673	chr10	686	6	0.485297	0.480737	0.495877	0.485275	0.460774	0.500518	0.527456	0.460699
14476	cg01037637 cg03004714 cg14360865 cg07980518 cg07486895	chr18 : 59560289 - chr18 : 59560433	chr18	144	5	0.467168	0.506457	0.494481	0.467168	0.460639	0.51694	0.486988	0.460639
21191	cg05556202 cg02322879 cg01883662 cg21845080 cg22496559 cg11363229 cg13605674 cg21090033	chr3 : 196065106 - chr3 : 196065357	chr3	251	8	0.473975	0.560646	0.437391	0.473909	0.459754	0.518826	0.393976	0.459608
4085	cg23223933 cg20564892 cg25123470 cg14489801 cg19221545 cg10725316	chr10 : 103603292 - chr10 : 103603869	chr10	577	6	0.496553	0.510144	0.496706	0.496531	0.45896	0.54087	0.456761	0.459093
19231	cg01962969 cg27307781 cg16719517 cg00695416 cg16662267 cg03841977	chr21 : 37442104 - chr21 : 37442777	chr21	673	6	0.529472	0.512958	0.478665	0.529407	0.458667	0.523435	0.459121	0.458516
27854	cg12507655 cg03568858 cg24075113 cg14020762 cg22851200 cg19566658	chr7 : 100465051 - chr7 : 100466241	chr7	1190	6	0.492954	0.498735	0.524847	0.492866	0.458366	0.537282	0.541756	0.458258
27457	cg03276785 cg19259179 cg13208318 cg17235702 cg16652817	chr7 : 54956202 - chr7 : 54956598	chr7	396	5	0.462849	0.525087	0.485166	0.462827	0.457517	0.523138	0.468173	0.457524
31080	cg20272754 cg26744369 cg00680081 cg10413105 cg27404676	chrX : 79590874 - chrX : 79590966	chrX	92	5	0.52164	0.536409	0.54123	0.52164	0.456955	0.536565	0.573071	0.456965
21096	cg17298181 cg12359697 cg03576234 cg12182991 cg13483916	chr3 : 187456175 - chr3 : 187456579	chr3	404	5	0.463242	0.522971	0.439638	0.463264	0.455015	0.494794	0.414344	0.455386
16249	cg15032393 cg17130812 cg17101553 cg15245120 cg20667230 cg19518132 cg21988233 cg23548487 cg18281016 cg07122126 cg20622311	chr19 : 58789915 - chr19 : 58790439	chr19	524	11	0.492125	0.505803	0.458072	0.492256	0.455146	0.500488	0.485803	0.454898
25202	cg26070383 cg07023208 cg14812313 cg19887824 cg25744682	chr6 : 32797241 - chr6 : 32797578	chr6	337	5	0.522469	0.512849	0.519001	0.522491	0.454941	0.506568	0.526227	0.454723
5497	cg18321548 cg04367345 cg00268840 cg04578774 cg22974228 cg16125371	chr11 : 44332624 - chr11 : 44332719	chr11	95	6	0.504298	0.552509	0.495375	0.504298	0.454528	0.560712	0.550246	0.454555
19211	cg02348151 cg27237300 cg21229268 cg17016394 cg20340508 cg05720454 cg01543173 cg02736969 cg03732762	chr21 : 34442257 - chr21 : 34443010	chr21	753	9	0.468674	0.491601	0.500873	0.468368	0.451569	0.557266	0.537328	0.451138
27801	cg08486903 cg18887230 cg17146738 cg26022064 cg20048529	chr7 : 98739496 - chr7 : 98740022	chr7	526	5	0.487456	0.482352	0.511649	0.487544	0.450598	0.514219	0.579004	0.450768
9543	cg00021108 cg03485262 cg16150677 cg23067281 cg08114373	chr14 : 92980026 - chr14 : 92980204	chr14	178	5	0.50373	0.494786	0.494001	0.503665	0.448936	0.500627	0.509752	0.448761
28006	cg26173847 cg26595520 cg00353923 cg07871590 cg06945399 cg27573591 cg15087147 cg04153784	chr7 : 127671017 - chr7 : 127672235	chr7	1218	8	0.476178	0.469066	0.489398	0.4762	0.448172	0.541088	0.434099	0.448093
24553	cg22494932 cg25699073 cg07134666 cg00588198 cg16885113 cg20228636	chr6 : 29648379 - chr6 : 29648525	chr6	146	6	0.482134	0.513743	0.494241	0.48209	0.447759	0.472771	0.507056	0.447823
17317	cg26236440 cg25521086 cg21934564 cg24706932 cg27310163 cg14318370	chr2 : 113341947 - chr2 : 113342262	chr2	315	6	0.490598	0.506545	0.523495	0.490641	0.447041	0.498301	0.524514	0.447132
27957	cg22424532 cg09118552 cg24836607 cg26423145 cg09911342 cg19800427	chr7 : 117067727 - chr7 : 117067978	chr7	251	6	0.460951	0.532788	0.508093	0.460995	0.446734	0.498651	0.512606	0.446815
25653	cg00530740 cg24906519 cg08302713 cg26752263 cg06706183 cg01015199 cg14869141	chr6 : 53409368 - chr6 : 53410056	chr6	688	7	0.500218	0.534729	0.462893	0.50024	0.446531	0.589993	0.412232	0.446511
20866	cg21835021 cg00906762 cg02710346 cg09392355 cg20117402 cg21089667 cg02059813	chr3 : 148805105 - chr3 : 148805294	chr3	189	7	0.514267	0.482526	0.502749	0.514267	0.443721	0.563365	0.464482	0.444261
18825	cg09053081 cg19839655 cg19785066 cg17929951 cg11841529 cg25239996 cg06571407 cg22232207	chr20 : 44746392 - chr20 : 44746825	chr20	433	8	0.471313	0.466667	0.478272	0.471313	0.4435	0.51617	0.471479	0.4435
25437	cg25473981 cg25808577 cg20405174 cg05994148 cg05233674 cg05106897 cg00444847 cg16984332	chr6 : 34433676 - chr6 : 34434017	chr6	341	8	0.451134	0.496488	0.509097	0.450916	0.442069	0.500432	0.514259	0.441672
25836	cg24753760 cg22541254 cg06247406 cg13080565 cg05942459 cg24301620 cg18193094 cg10591607	chr6 : 101846767 - chr6 : 101846916	chr6	149	8	0.5024	0.47812	0.518368	0.502291	0.441583	0.584343	0.531753	0.441546
2683	cg06268921 cg23971069 cg10288510 cg18318878 cg06623935	chr1 : 214158573 - chr1 : 214159131	chr1	558	5	0.489463	0.538176	0.467888	0.489463	0.440093	0.436594	0.491089	0.440103
4812	cg18732172 cg15661311 cg14468692 cg01704474 cg20813589 cg23927970 cg23687466	chr11 : 504301 - chr11 : 504937	chr11	636	7	0.539747	0.460515	0.547579	0.539725	0.439587	0.519446	0.476153	0.439613
18514	cg16831623 cg24674635 cg06818307 cg18039133 cg25636478	chr20 : 6750617 - chr20 : 6750989	chr20	372	5	0.461933	0.506043	0.503643	0.461955	0.437273	0.508379	0.45903	0.437356
24671	cg22053904 cg25298725 cg12007166 cg07723510 cg11456756 cg13445593 cg27011480 cg14142171 cg10605681 cg08958598 cg14183206	chr6 : 30228007 - chr6 : 30228169	chr6	162	11	0.473669	0.468717	0.49627	0.473647	0.436408	0.500745	0.49482	0.436222
10573	cg20775959 cg05201477 cg18821485 cg07935500 cg21348997 cg15804782 cg17788682 cg20081969	chr15 : 80696264 - chr15 : 80697055	chr15	791	8	0.494612	0.521422	0.477269	0.494612	0.434824	0.547037	0.516714	0.434944
30095	cg13389508 cg17560015 cg14695663 cg23324953 cg06045337 cg05696706	chr8 : 145012644 - chr8 : 145013932	chr8	1288	6	0.424193	0.513416	0.439812	0.424171	0.432894	0.558515	0.422457	0.432701
11269	cg17360233 cg06754445 cg05064297 cg04467063 cg03647724	chr16 : 10479841 - chr16 : 10480289	chr16	448	5	0.513547	0.506305	0.510297	0.513482	0.432244	0.525532	0.45407	0.43218
1370	cg15089077 cg24550149 cg19022697 cg15645660 cg11949335	chr1 : 55246867 - chr1 : 55247408	chr1	541	5	0.49675	0.486889	0.539354	0.496706	0.432188	0.551462	0.542624	0.432062
1207	cg17585197 cg09865676 cg14180916 cg19581816 cg23234434	chr1 : 43389836 - chr1 : 43390705	chr1	869	5	0.47873	0.511562	0.519786	0.478752	0.431409	0.473031	0.522861	0.431572
3421	cg17098147 cg13933080 cg12610471 cg12377139 cg23016129 cg18247055	chr10 : 22634142 - chr10 : 22634226	chr10	84	6	0.523975	0.520397	0.510079	0.523975	0.431344	0.532074	0.477879	0.431299
22676	cg00107916 cg18472159 cg01086526 cg13033070 cg18315943	chr5 : 3188066 - chr5 : 3188374	chr5	308	5	0.448582	0.479799	0.504625	0.44856	0.430931	0.591737	0.528067	0.430856
24244	cg00903676 cg01272707 cg15804105 cg27209395 cg27579711	chr6 : 26172091 - chr6 : 26172931	chr6	840	5	0.508355	0.516383	0.514463	0.508268	0.43042	0.546259	0.461483	0.430523
12099	cg03787864 cg26537639 cg04879832 cg08843517 cg09025501 cg08177833 cg00054525 cg10246531 cg24046411 cg05744675 cg19790294 cg03870138 cg27176614	chr16 : 88717134 - chr16 : 88717989	chr16	855	13	0.486344	0.471379	0.496161	0.486409	0.428899	0.505345	0.526852	0.428728
14564	cg16580499 cg05884032 cg16433156 cg06954658 cg07382554 cg14007067 cg15191648 cg13794993	chr18 : 76739559 - chr18 : 76740284	chr18	725	8	0.473757	0.519328	0.458617	0.473735	0.42716	0.546836	0.474307	0.427267
21974	cg23975375 cg22848779 cg15299721 cg12532398 cg10261589	chr4 : 103997221 - chr4 : 103997969	chr4	748	5	0.501636	0.509817	0.500044	0.501527	0.427035	0.487951	0.47547	0.426833
29404	cg17498803 cg22340072 cg26295808 cg20904475 cg06011086	chr8 : 61822428 - chr8 : 61823275	chr8	847	5	0.471422	0.531523	0.48798	0.471335	0.425871	0.504503	0.507478	0.425167
15017	cg21610904 cg10755961 cg24874111 cg18587364 cg20631204 cg14073063 cg14308647 cg17704570 cg20154743	chr19 : 9785511 - chr19 : 9786077	chr19	566	9	0.479058	0.497295	0.471771	0.479036	0.4241	0.478031	0.453406	0.424155
12734	cg03940157 cg14336879 cg08834269 cg05296978 cg04614997	chr17 : 27333108 - chr17 : 27333185	chr17	77	5	0.495921	0.503752	0.502596	0.495964	0.418641	0.476501	0.501191	0.418762
13065	cg07803108 cg03902729 cg03384000 cg00462994 cg21515349 cg10172783	chr17 : 42081927 - chr17 : 42082036	chr17	109	6	0.461736	0.473713	0.482853	0.461693	0.419275	0.588373	0.483813	0.418642
16221	cg22299467 cg22510337 cg02280912 cg24124798 cg15759937 cg15746696 cg27112264 cg25400396 cg18860954	chr19 : 58399865 - chr19 : 58400574	chr19	709	9	0.487173	0.45914	0.474215	0.487216	0.411969	0.571507	0.476026	0.412108
8645	cg04821942 cg16624069 cg02799880 cg21712331 cg27518324 cg10811485	chr13 : 99629970 - chr13 : 99630583	chr13	613	6	0.486235	0.487544	0.504079	0.486235	0.407465	0.538376	0.505878	0.407452
24248	cg01420254 cg08117800 cg02612650 cg08122386 cg03181300	chr6 : 26195488 - chr6 : 26195995	chr6	507	5	0.510275	0.517408	0.477182	0.510318	0.399345	0.530626	0.394607	0.399318
29883	cg13157980 cg11006453 cg23731089 cg19352830 cg06401414	chr8 : 141599141 - chr8 : 141599436	chr8	295	5	0.429581	0.584468	0.45445	0.429581	0.396761	0.582481	0.41897	0.396761
16305	cg14072418 cg04344532 cg10414026 cg02758766 cg22595526	chr2 : 740025 - chr2 : 740718	chr2	693	5	0.439332	0.500065	0.451942	0.439332	0.373521	0.493361	0.482981	0.373449
