# Supplementary material for: Predicting lung adenocarcinoma disease progression using methylation-correlated blocks and ensemble machine learning classifiers
Source: PeerJ. 2021 Feb 16;9:e10884. doi: 10.7717/peerj.10884 (PMC7894106; doi:10.7717/peerj.10884)
Supplement: Table S5 [file peerj-09-10884-s008.xlsx]

## Sheet: env
#platform	x86_64-redhat-linux-gnu
#arch	x86_64
#os	linux-gnu
#system	x86_64, linux-gnu
#major package	foreach, doParallel, parallel, stats, survivalROC, glmnet, rms, survivalsvm, ggplot2, minfi, IlluminaHumanMethylation450kanno.ilmn12.hg19, survival, utils, testthat, Biobase, survminer, affycoretools, knitr, plotROC, prognosticROC
#language	R
#version	3.5.0 or higher
name	Package	Version (minimum requirement)	Depends
FDb.InfiniumMethylation.hg19	FDb.InfiniumMethylation.hg19	2.2.0	R (>= 2.10), GenomicFeatures (>= 1.7.22), TxDb.Hsapiens.UCSC.hg19.knownGene, org.Hs.eg.db
ggbiplot	ggbiplot	0.55	ggplot2, plyr, scales, grid
methylumi	methylumi	2.32.0	Biobase, methods, R (>= 2.13), scales, reshape2, ggplot2, matrixStats, FDb.InfiniumMethylation.hg19 (>= 2.2.0), minfi
org.Hs.eg.db	org.Hs.eg.db	3.10.0	R (>= 2.7.0), methods, AnnotationDbi (>= 1.47.1)
pheatmap	pheatmap	1.0.12	R (>= 2.0)
TxDb.Hsapiens.UCSC.hg19.knownGene	TxDb.Hsapiens.UCSC.hg19.knownGene	3.2.2	GenomicFeatures (>= 1.21.30)
vctrs	vctrs	0.3.4	R (>= 3.2)
abind	abind	1.4-5	R (>= 1.5.0)
acepack	acepack	1.4.1	NA
ade4	ade4	1.7-15	R (>= 2.10)
affy	affy	1.64.0	R (>= 2.8.0), BiocGenerics (>= 0.1.12), Biobase (>= 2.5.5)
affycoretools	affycoretools	1.58.4	Biobase, methods
affyio	affyio	1.56.0	R (>= 2.6.0)
airway	airway	1.6.0	R (>= 3.5.0), SummarizedExperiment
akima	akima	0.6-2.1	R (>= 2.0.0)
annotate	annotate	1.64.0	R (>= 2.10), AnnotationDbi (>= 1.27.5), XML
AnnotationDbi	AnnotationDbi	1.48.0	R (>= 2.7.0), methods, utils, stats4, BiocGenerics (>= 0.29.2), Biobase (>= 1.17.0), IRanges
AnnotationFilter	AnnotationFilter	1.10.0	R (>= 3.4.0)
AnnotationForge	AnnotationForge	1.28.0	R (>= 3.5.0), methods, utils, BiocGenerics (>= 0.15.10), Biobase (>= 1.17.0), AnnotationDbi (>= 1.33.14)
apcluster	apcluster	1.4.8	R (>= 3.0.0)
askpass	askpass	1.1	NA
assertthat	assertthat	0.2.1	NA
backports	backports	1.1.9	R (>= 3.0.0)
base	base	3.6.0	NA
base64	base64	2	NA
base64enc	base64enc	0.1-3	R (>= 2.9.0)
beanplot	beanplot	1.2	NA
BH	BH	1.72.0-3	NA
BiasedUrn	BiasedUrn	1.07	NA
bibtex	bibtex	0.4.2.2	R (>= 3.0.2)
bigalgebra	bigalgebra	0.8.4.2	bigmemory (>= 4.0.0)
bigmemory	bigmemory	4.5.36	R (>= 3.2.0),
bigmemory.sri	bigmemory.sri	0.1.3	NA
bindr	bindr	0.1.1	NA
bindrcpp	bindrcpp	0.2.2	NA
Biobase	Biobase	2.46.0	R (>= 2.10), BiocGenerics (>= 0.27.1), utils
BiocFileCache	BiocFileCache	1.10.2	R (>= 3.4.0), dbplyr (>= 1.0.0)
BiocGenerics	BiocGenerics	0.32.0	R (>= 3.6.0), methods, utils, graphics, stats, parallel
BiocManager	BiocManager	1.30.10	NA
BiocParallel	BiocParallel	1.20.1	methods
BiocVersion	BiocVersion	3.10.1	R (>= 3.6.0)
biomaRt	biomaRt	2.42.1	methods
Biostrings	Biostrings	2.54.0	R (>= 3.5.0), methods, BiocGenerics (>= 0.31.5), S4Vectors (>= 0.21.13), IRanges, XVector (>= 0.23.2)
biovizBase	biovizBase	1.34.1	R (>= 3.5.0), methods
bit	bit	4.0.4	R (>= 2.9.2)
bit64	bit64	4.0.2	R (>= 3.0.1), bit (>= 4.0.0), utils, methods, stats
bitops	bitops	1.0-6	NA
blob	blob	1.2.1	NA
boot	boot	1.3-25	R (>= 3.0.0), graphics, stats
brew	brew	1.0-6	NA
broom	broom	0.7.0	R (>= 3.1)
BSgenome	BSgenome	1.54.0	R (>= 2.8.0), methods, BiocGenerics (>= 0.13.8), S4Vectors (>= 0.17.28), IRanges (>= 2.13.16), GenomeInfoDb (>= 1.15.2), GenomicRanges (>= 1.31.10), Biostrings (>= 2.47.6), rtracklayer (>= 1.39.7)
bumphunter	bumphunter	1.28.0	R (>= 3.5), S4Vectors (>= 0.9.25), IRanges (>= 2.3.23), GenomeInfoDb, GenomicRanges, foreach, iterators, methods, parallel, locfit
callr	callr	3.4.3	NA
car	car	3.0-9	R (>= 3.5.0), carData (>= 3.0-0)
carData	carData	3.0-4	R (>= 3.5.0)
caret	caret	6.0-86	R (>= 3.2.0), lattice (>= 0.20), ggplot2
Category	Category	2.52.1	methods, stats4, BiocGenerics, AnnotationDbi, Biobase, Matrix
caTools	caTools	1.18.0	R (>= 3.6.0)
cellranger	cellranger	1.1.0	R (>= 3.0.0)
checkmate	checkmate	2.0.0	R (>= 3.0.0)
class	class	7.3-17	R (>= 3.0.0), stats, utils
cli	cli	2.0.2	R (>= 2.10)
clipr	clipr	0.7.0	NA
clisymbols	clisymbols	1.2.0	NA
clue	clue	0.3-57	R (>= 3.2.0)
cluster	cluster	2.1.0	R (>= 3.3.0)
cmprsk	cmprsk	2.2-10	R (>= 3.0.0), survival
coda	coda	0.19-3	R (>= 2.14.0)
codetools	codetools	0.2-16	R (>= 2.1)
colorspace	colorspace	1.4-1	R (>= 3.0.0), methods
COMBAT	COMBAT	0.0.4	mvtnorm, corpcor, R (>= 3.2.0)
combinat	combinat	0.0-8	NA
commonmark	commonmark	1.7	NA
compiler	compiler	3.6.0	NA
conquer	conquer	1.0.2	R (>= 3.5.0)
corpcor	corpcor	1.6.9	R (>= 3.0.2)
corrgram	corrgram	1.13	NA
corrplot	corrplot	0.84	NA
covr	covr	3.5.0	R (>= 3.1.0), methods
cowplot	cowplot	1.0.0	R (>= 3.5.0)
cpp11	cpp11	0.2.1	NA
crayon	crayon	1.3.4	NA
crosstalk	crosstalk	1.1.0.1	NA
curl	curl	4.3	R (>= 3.0.0)
CVST	CVST	0.2-2	kernlab,Matrix
data.table	data.table	1.13.0	R (>= 3.1.0)
datasets	datasets	3.6.0	NA
DBI	DBI	1.1.0	methods, R (>= 3.0.0)
dbplyr	dbplyr	1.4.4	R (>= 3.1)
ddalpha	ddalpha	1.3.11	R (>= 2.10), stats, utils, graphics, grDevices, MASS, class, robustbase, sfsmisc, geometry
DelayedArray	DelayedArray	0.12.3	R (>= 3.4), methods, stats4, matrixStats, BiocGenerics (>= 0.31.5), S4Vectors (>= 0.24.4), IRanges (>= 2.17.3), BiocParallel
DelayedMatrixStats	DelayedMatrixStats	1.8.0	DelayedArray (>= 0.11.1)
dendextend	dendextend	1.14.0	R (>= 3.0.0)
DEoptimR	DEoptimR	1.0-8	NA
desc	desc	1.2.0	R (>= 3.1.0)
DESeq2	DESeq2	1.26.0	S4Vectors (>= 0.23.18), IRanges, GenomicRanges, SummarizedExperiment (>= 1.1.6)
devtools	devtools	2.3.1	R (>= 3.0.2), usethis (>= 1.6.0)
dichromat	dichromat	2.0-0	R (>= 2.10), stats
digest	digest	0.6.25	R (>= 3.1.0)
dimRed	dimRed	0.2.3	R (>= 3.0.0), DRR
diptest	diptest	0.75-7	NA
doMC	doMC	1.3.6	R (>= 2.14.0), foreach(>= 1.2.0), iterators(>= 1.0.0), parallel
doParallel	doParallel	1.0.15	R (>= 2.14.0), foreach(>= 1.2.0), iterators(>= 1.0.0), parallel, utils
doRNG	doRNG	1.8.2	R (>= 3.0.0), foreach, rngtools (>= 1.5)
dotCall64	dotCall64	1.0-0	R (>= 3.1)
dplyr	dplyr	1.0.2	R (>= 3.2.0)
DRR	DRR	0.0.4	kernlab, CVST, Matrix
DT	DT	0.15	NA
dynamicTreeCut	dynamicTreeCut	1.63-1	R (>= 2.3.0), stats
e1071	e1071	1.7-3	NA
edgeR	edgeR	3.28.1	R (>= 3.6.0), limma (>= 3.41.5)
effects	effects	4.2-0	R (>= 3.5.0), carData
ellipsis	ellipsis	0.3.1	R (>= 3.2)
EMMREML	EMMREML	3.1	Matrix, stats
ensembldb	ensembldb	2.10.2	BiocGenerics (>= 0.15.10), GenomicRanges (>= 1.31.18), GenomicFeatures (>= 1.29.10), AnnotationFilter (>= 1.5.2)
estimability	estimability	1.3	stats
evaluate	evaluate	0.14	R (>= 3.0.2)
exactRankTests	exactRankTests	0.8-31	R (>= 2.4.0), stats, utils
fansi	fansi	0.4.1	R (>= 3.1.0)
farver	farver	2.0.3	NA
fastcluster	fastcluster	1.1.25	R (>= 3.0.0)
fastmap	fastmap	1.0.1	NA
fastmatch	fastmatch	1.1-0	NA
fBasics	fBasics	3042.89.1	R (>= 2.15.1), timeDate, timeSeries
fda	fda	5.1.5.1	R (>= 3.5), Matrix
FDb.InfiniumMethylation.hg19	FDb.InfiniumMethylation.hg19	2.2.0	R (>= 2.10), GenomicFeatures (>= 1.7.22), TxDb.Hsapiens.UCSC.hg19.knownGene, org.Hs.eg.db
ff	ff	4.0.2	R (>= 2.10.1), bit (>= 4.0.0), utils
fields	fields	10.3	R (>= 3.0), methods, spam, maps
fit.models	fit.models	0.64	NA
flashClust	flashClust	1.01-2	R (>= 2.3.0)
flexmix	flexmix	2.3-15	R (>= 2.15.0), lattice
forcats	forcats	0.5.0	R (>= 3.2)
foreach	foreach	1.5.0	R (>= 2.5.0)
foreign	foreign	0.8-75	R (>= 3.0.0)
formatR	formatR	1.7	R (>= 3.0.2)
Formula	Formula	1.2-3	R (>= 2.0.0), stats
fpc	fpc	2.2-7	R (>= 2.0)
fs	fs	1.5.0	R (>= 3.1)
futile.logger	futile.logger	1.4.3	R (>= 3.0.0)
futile.options	futile.options	1.0.1	R (>= 2.8.0)
gbRd	gbRd	0.4-11	tools
gclus	gclus	1.3.2	R (>= 2.10), cluster
gcrma	gcrma	2.58.0	R (>= 2.6.0), affy (>= 1.23.2), graphics, methods, stats, utils
gdata	gdata	2.18.0	R (>= 2.3.0)
genefilter	genefilter	1.68.0	NA
geneplotter	geneplotter	1.64.0	R (>= 2.10), methods, Biobase, BiocGenerics, lattice, annotate
generics	generics	0.0.2	R (>= 3.1)
genetics	genetics	1.3.8.1.2	combinat, gdata, gtools, MASS, mvtnorm
GenomeInfoDb	GenomeInfoDb	1.22.1	R (>= 3.1), methods, BiocGenerics (>= 0.13.8), S4Vectors (>= 0.17.25), IRanges (>= 2.13.12)
GenomeInfoDbData	GenomeInfoDbData	1.2.2	R (>= 3.5.0)
GenomicAlignments	GenomicAlignments	1.22.1	R (>= 3.5.0), methods, BiocGenerics (>= 0.15.3), S4Vectors (>= 0.23.19), IRanges (>= 2.15.12), GenomeInfoDb (>= 1.13.1), GenomicRanges (>= 1.37.2), SummarizedExperiment (>= 1.9.13), Biostrings (>= 2.47.6), Rsamtools (>= 1.31.2)
GenomicFeatures	GenomicFeatures	1.38.2	BiocGenerics (>= 0.1.0), S4Vectors (>= 0.17.29), IRanges (>= 2.13.23), GenomeInfoDb (>= 1.15.4), GenomicRanges (>= 1.31.17), AnnotationDbi (>= 1.41.4)
GenomicRanges	GenomicRanges	1.38.0	R (>= 2.10), methods, stats4, BiocGenerics (>= 0.25.3), S4Vectors (>= 0.23.19), IRanges (>= 2.19.9), GenomeInfoDb (>= 1.15.2)
geometry	geometry	0.4.5	R (>= 3.0.0)
GEOquery	GEOquery	2.54.1	methods, Biobase
GGally	GGally	2.0.0	R (>= 3.1), ggplot2 (>= 3.3.0)
ggbio	ggbio	1.34.0	methods, BiocGenerics, ggplot2 (>= 1.0.0)
ggforce	ggforce	0.3.2	ggplot2 (>= 3.0.0), R (>= 3.3.0)
ggfortify	ggfortify	0.4.10	methods, ggplot2 (>= 2.0.0)
ggplot2	ggplot2	3.3.2	R (>= 3.2)
ggplotify	ggplotify	0.0.5	R (>= 3.4.0)
ggpubr	ggpubr	0.4.0	R (>= 3.1.0), ggplot2
ggraph	ggraph	2.0.3	R (>= 2.10), ggplot2 (>= 3.0.0)
ggrepel	ggrepel	0.8.2	R (>= 3.0.0), ggplot2 (>= 2.2.0)
ggridges	ggridges	0.5.2	R (>= 3.2)
ggsci	ggsci	2.9	R (>= 3.0.2)
ggsignif	ggsignif	0.6.0	NA
ggthemes	ggthemes	4.2.0	R (>= 3.3.0)
ggvis	ggvis	0.4.5	R (>= 3.0)
gh	gh	1.1.0	NA
git2r	git2r	0.27.1	R (>= 3.1)
Glimma	Glimma	1.14.0	R (>= 3.4.0)
glmnet	glmnet	4.0-2	R (>= 3.6.0), Matrix (>= 1.0-6)
globals	globals	0.12.5	R (>= 3.1.2)
glue	glue	1.4.2	R (>= 3.2)
gmodels	gmodels	2.18.1	R (>= 1.9.0)
GO.db	GO.db	3.10.0	R (>= 2.7.0), methods, AnnotationDbi (>= 1.47.1)
GOstats	GOstats	2.52.0	R (>= 2.10), Biobase (>= 1.15.29), Category (>= 2.43.2), graph
gower	gower	0.2.2	NA
gplots	gplots	3.0.4	R (>= 3.0)
graph	graph	1.64.0	R (>= 2.10), methods, BiocGenerics (>= 0.13.11)
graphics	graphics	3.6.0	NA
graphlayouts	graphlayouts	0.7.0	R (>= 3.2.0)
grDevices	grDevices	3.6.0	NA
grid	grid	3.6.0	NA
gridExtra	gridExtra	2.3	NA
gridGraphics	gridGraphics	0.5-0	grid, graphics
gridSVG	gridSVG	1.7-2	NA
GSEABase	GSEABase	1.48.0	R (>= 2.6.0), BiocGenerics (>= 0.13.8), Biobase (>= 2.17.8), annotate (>= 1.45.3), methods, graph (>= 1.37.2)
gss	gss	2.2-2	R (>= 3.0.0), stats
gtable	gtable	0.3.0	R (>= 3.0)
gtools	gtools	3.8.2	methods, stats, utils
haplo.stats	haplo.stats	1.7.9	R (>= 3.0.0), methods, stats, graphics
haven	haven	2.3.1	R (>= 3.2)
HDF5Array	HDF5Array	1.14.4	R (>= 3.4), methods, DelayedArray (>= 0.12.3), rhdf5 (>= 2.30.1)
hexbin	hexbin	1.28.1	R (>= 2.0.1), methods
highr	highr	0.8	R (>= 3.2.3)
Hmisc	Hmisc	4.4-1	lattice, survival (>= 3.1-6), Formula, ggplot2 (>= 2.2)
hms	hms	0.5.3	NA
htmlTable	htmlTable	2.0.1	NA
htmltools	htmltools	0.5.0	R (>= 2.14.1)
htmlwidgets	htmlwidgets	1.5.1	NA
httpuv	httpuv	1.5.4	R (>= 2.15.1)
httr	httr	1.4.2	R (>= 3.2)
hwriter	hwriter	1.3.2	R (>= 2.6.0)
igraph	igraph	1.2.5	methods
IlluminaHumanMethylation450kanno.ilmn12.hg19	IlluminaHumanMethylation450kanno.ilmn12.hg19	0.6.0	R (>= 3.3.0), minfi (>= 1.19.15)
illuminaio	illuminaio	0.28.0	NA
infotheo	infotheo	1.2.0	NA
ini	ini	0.3.1	NA
insight	insight	0.9.1	R (>= 3.2)
ipred	ipred	0.9-9	R (>= 2.10)
IRanges	IRanges	2.20.2	R (>= 3.1.0), methods, utils, stats, BiocGenerics (>= 0.25.3), S4Vectors (>= 0.23.22)
isoband	isoband	0.2.2	NA
iterators	iterators	1.0.12	R (>= 2.5.0), utils
jpeg	jpeg	0.1-8.1	R (>= 2.9.0)
jsonlite	jsonlite	1.7.0	methods
kernlab	kernlab	0.9-29	R (>= 2.10)
KernSmooth	KernSmooth	2.23-17	R (>= 2.5.0), stats
km.ci	km.ci	0.5-2	R (>= 1.8.0), survival, stats
KMsurv	KMsurv	0.1-5	NA
knitr	knitr	1.29	R (>= 3.2.3)
labeling	labeling	0.3	NA
labelled	labelled	2.6.0	NA
lambda.r	lambda.r	1.2.4	R (>= 3.0.0)
lars	lars	1.2	R (>= 2.10)
later	later	1.1.0.1	NA
lattice	lattice	0.20-41	R (>= 3.0.0)
latticeExtra	latticeExtra	0.6-29	R (>= 3.6.0), lattice
lava	lava	1.6.7	R (>= 3.0)
lazyeval	lazyeval	0.2.2	R (>= 3.1.0)
lifecycle	lifecycle	0.2.0	R (>= 3.2)
limma	limma	3.42.2	R (>= 3.6.0)
linprog	linprog	0.9-2	R (>= 2.4.0), lpSolve
listenv	listenv	0.8.0	R (>= 3.1.2)
lme4	lme4	1.1-23	R (>= 3.2.0), Matrix (>= 1.2-1), methods, stats
lmerTest	lmerTest	3.1-2	R (>= 3.2.5), lme4 (>= 1.1-10), stats, methods
locfit	locfit	1.5-9.4	R (>= 3.5.0)
lpSolve	lpSolve	5.6.15	NA
lubridate	lubridate	1.7.9	methods, R (>= 3.2)
lumi	lumi	2.38.0	R (>= 2.10), Biobase (>= 2.5.5)
magic	magic	1.5-9	R (>= 2.10), abind
magrittr	magrittr	1.5	NA
manipulateWidget	manipulateWidget	0.10.1	NA
maps	maps	3.3.0	R (>= 3.0.0)
maptools	maptools	1.0-2	R (>= 2.10), sp (>= 1.0-11)
markdown	markdown	1.1	R (>= 2.11.1)
MASS	MASS	7.3-52	R (>= 3.1.0), grDevices, graphics, stats, utils
matlab	matlab	1.0.2	R (>= 2.15)
Matrix	Matrix	1.2-18	R (>= 3.2.0)
MatrixModels	MatrixModels	0.4-1	R (>= 3.0.1)
matrixStats	matrixStats	0.56.0	R (>= 2.12.0)
maxstat	maxstat	0.7-25	R (>= 1.7.0)
mclust	mclust	5.4.6	R (>= 3.0)
mcmc	mcmc	0.9-7	R (>= 3.0.2)
MCMCpack	MCMCpack	1.4-9	R (>= 3.6), coda (>= 0.11-3), MASS, stats
memoise	memoise	1.1.0	NA
methods	methods	3.6.0	NA
methylumi	methylumi	2.32.0	Biobase, methods, R (>= 2.13), scales, reshape2, ggplot2, matrixStats, FDb.InfiniumMethylation.hg19 (>= 2.2.0), minfi
mgcv	mgcv	1.8-33	R (>= 2.14.0), nlme (>= 3.1-64)
mime	mime	0.9	NA
minfi	minfi	1.32.0	methods, BiocGenerics (>= 0.15.3), GenomicRanges, SummarizedExperiment (>= 1.1.6), Biostrings, bumphunter (>= 1.1.9)
miniUI	miniUI	0.1.1.1	NA
minqa	minqa	1.2.4	NA
mitools	mitools	2.4	NA
mlbench	mlbench	2.1-1	R (>= 2.10)
mnormt	mnormt	1.5-6	R (>= 2.2.0)
modeest	modeest	2.4.0	R (>= 3.2)
ModelMetrics	ModelMetrics	1.2.2.2	R (>= 3.2.2)
modeltools	modeltools	0.2-23	stats, stats4
moments	moments	0.14	NA
multcomp	multcomp	1.4-13	stats, graphics, mvtnorm (>= 1.0-10), survival (>= 2.39-4), TH.data (>= 1.0-2)
multtest	multtest	2.42.0	R (>= 2.10), methods, BiocGenerics, Biobase
munsell	munsell	0.5.0	NA
mvtnorm	mvtnorm	1.1-1	R(>= 3.5.0)
nleqslv	nleqslv	3.3.2	NA
nlme	nlme	3.1-149	R (>= 3.4.0)
nloptr	nloptr	1.2.1	NA
nnet	nnet	7.3-14	R (>= 3.0.0), stats, utils
nor1mix	nor1mix	1.3-0	NA
nortest	nortest	1.0-4	NA
numDeriv	numDeriv	2016.8-1.1	R (>= 2.11.1)
oligoClasses	oligoClasses	1.48.0	R (>= 2.14)
openssl	openssl	1.4.2	NA
openxlsx	openxlsx	4.1.5	R (>= 3.3.0)
org.Hs.eg.db	org.Hs.eg.db	3.10.0	R (>= 2.7.0), methods, AnnotationDbi (>= 1.47.1)
OrganismDbi	OrganismDbi	1.28.0	R (>= 2.14.0), methods, BiocGenerics (>= 0.15.10), AnnotationDbi (>= 1.33.15), GenomicFeatures (>= 1.23.31)
outliers	outliers	0.14	R (>= 2.0)
parallel	parallel	3.6.0	NA
parmigene	parmigene	1.1.0	NA
pbkrtest	pbkrtest	0.4-8.6	R (>= 3.6.0), lme4 (>= 1.1.10)
pcaPP	pcaPP	1.9-73	NA
permute	permute	0.9-5	R (>= 2.14.0)
PFAM.db	PFAM.db	3.10.0	R (>= 2.7.0), methods, AnnotationDbi (>= 1.47.1)
pillar	pillar	1.4.6	NA
pixmap	pixmap	0.4-11	methods
pkgbuild	pkgbuild	1.1.0	R (>= 3.1)
pkgconfig	pkgconfig	2.0.3	NA
pkgload	pkgload	1.1.0	NA
pkgmaker	pkgmaker	0.31.1	R (>= 3.0.0), methods, stats, registry
plogr	plogr	0.2.0	NA
plotly	plotly	4.9.2.1	R (>= 3.2.0), ggplot2 (>= 3.0.0)
plotrix	plotrix	3.7-8	R (>= 3.5.0)
plotROC	plotROC	2.2.1	R (>= 3.0.0), ggplot2
pls	pls	2.7-3	R (>= 2.10)
plsgenomics	plsgenomics	1.5-2	R (>= 3.0)
plyr	plyr	1.8.6	R (>= 3.1.0)
png	png	0.1-7	R (>= 2.9.0)
polspline	polspline	1.1.19	NA
polyclip	polyclip	1.10-0	R (>= 3.0.0)
polynom	polynom	1.4-0	NA
prabclus	prabclus	2.3-2	R (>= 2.10), MASS, mclust
pracma	pracma	2.2.9	R (>= 3.1.0)
praise	praise	1.0.0	NA
preprocessCore	preprocessCore	1.48.0	NA
prettyunits	prettyunits	1.1.1	NA
princurve	princurve	2.1.5	R (>= 3.0)
pROC	pROC	1.16.2	R (>= 2.14)
processx	processx	3.4.3	NA
prodlim	prodlim	2019.11.13	R (>= 2.9.0)
prognosticROC	prognosticROC	0.7	splines, survival
progress	progress	1.2.2	NA
promises	promises	1.1.1	NA
ProtGenerics	ProtGenerics	1.18.0	methods
ps	ps	1.3.4	R (>= 3.1)
purrr	purrr	0.3.4	R (>= 3.2)
qap	qap	0.1-1	NA
qpdf	qpdf	1.1	NA
quadprog	quadprog	1.5-8	R (>= 3.1.0)
quadrupen	quadrupen	0.2-7	Rcpp, ggplot2, Matrix
quantreg	quantreg	5.61	R (>= 2.6), stats, SparseM
R.matlab	R.matlab	3.6.2	R (>= 2.14.0)
R.methodsS3	R.methodsS3	1.8.1	R (>= 2.13.0)
R.oo	R.oo	1.24.0	R (>= 2.13.0), R.methodsS3 (>= 1.8.0)
R.utils	R.utils	2.10.1	R (>= 2.14.0), R.oo (>= 1.23.0)
R2HTML	R2HTML	2.3.2	R (>= 2.0)
R6	R6	2.4.1	R (>= 3.0)
randomForestSRC	randomForestSRC	2.9.3	R (>= 3.5.0),
rappdirs	rappdirs	0.3.1	R (>= 2.14), methods
RBGL	RBGL	1.62.1	graph, methods
rcmdcheck	rcmdcheck	1.3.3	NA
RColorBrewer	RColorBrewer	1.1-2	R (>= 2.0.0)
Rcpp	Rcpp	1.0.5	NA
RcppArmadillo	RcppArmadillo	0.9.900.2.0	R (>= 3.3.0)
RcppEigen	RcppEigen	0.3.3.7.0	R (>= 2.15.1)
RcppProgress	RcppProgress	0.4.2	NA
RCurl	RCurl	1.98-1.2	R (>= 3.4.0), methods
Rdpack	Rdpack	1.0.0	R (>= 2.15.0), methods
readr	readr	1.3.1	R (>= 3.1)
readstata13	readstata13	0.9.2	NA
readxl	readxl	1.3.1	NA
recipes	recipes	0.1.13	R (>= 3.1), dplyr
registry	registry	0.5-1	R (>= 2.6.0)
relimp	relimp	1.0-5	R (>= 2.0.0)
rematch	rematch	1.0.1	NA
rematch2	rematch2	2.1.2	NA
remotes	remotes	2.2.0	R (>= 3.0.0)
ReportingTools	ReportingTools	2.26.0	methods, knitr, utils
reshape	reshape	0.8.8	R (>= 2.6.1)
reshape2	reshape2	1.4.4	R (>= 3.1)
rex	rex	1.2.0	NA
rgl	rgl	0.100.54	R (>= 3.2.0)
Rgraphviz	Rgraphviz	2.30.0	R (>= 2.6.0), methods, utils, graph, grid
rhdf5	rhdf5	2.30.1	R (>= 3.5.0), methods
Rhdf5lib	Rhdf5lib	1.8.0	NA
RhpcBLASctl	RhpcBLASctl	0.20-137	NA
Rhtslib	Rhtslib	1.18.1	NA
rio	rio	0.5.16	R (>= 2.15.0)
RISmed	RISmed	2.1.7	R (>= 2.8.0), methods
rlang	rlang	0.4.7	R (>= 3.2.0)
rmarkdown	rmarkdown	2.3	R (>= 3.0)
rms	rms	6.0-1	R (>= 3.5.0), Hmisc (>= 4.3-0), survival (>= 3.1-12), lattice, ggplot2 (>= 2.2), SparseM
rmutil	rmutil	1.1.5	R (>= 1.4)
rngtools	rngtools	1.5	R (>= 3.2.0), methods
robust	robust	0.5-0.0	fit.models
robustbase	robustbase	0.93-6	R (>= 3.1.0)
ROCR	ROCR	1.0-11	R (>= 3.6)
roxygen2	roxygen2	7.1.1	R (>= 3.2)
rpart	rpart	4.1-15	R (>= 2.15.0), graphics, stats, grDevices
rprojroot	rprojroot	1.3-2	R (>= 3.0.0)
rrcov	rrcov	1.5-5	R (>= 2.10), robustbase (>= 0.92.1), methods
Rsamtools	Rsamtools	2.2.3	methods, GenomeInfoDb (>= 1.1.3), GenomicRanges (>= 1.31.8), Biostrings (>= 2.47.6)
RSQLite	RSQLite	2.2.0	R (>= 3.1.0)
rstatix	rstatix	0.6.0	R (>= 3.3.0)
rstudioapi	rstudioapi	0.11	NA
rtracklayer	rtracklayer	1.46.0	R (>= 3.3), methods, GenomicRanges (>= 1.37.2)
ruv	ruv	0.9.7.1	NA
rvcheck	rvcheck	0.1.8	R (>= 3.4.0)
rversions	rversions	2.0.2	NA
S4Vectors	S4Vectors	0.24.4	R (>= 3.3.0), methods, utils, stats, stats4, BiocGenerics (>= 0.31.1)
sandwich	sandwich	2.5-1	R (>= 2.10.0)
scales	scales	1.1.1	R (>= 3.2)
scatterplot3d	scatterplot3d	0.3-41	R (>= 2.7.0)
scrime	scrime	1.3.5	NA
selectr	selectr	0.4-2	R (>= 3.0)
seriation	seriation	1.2-8	R (>= 2.14.0)
sessioninfo	sessioninfo	1.1.1	NA
setRNG	setRNG	2013.9-1	R (>= 2.5.0)
sfsmisc	sfsmisc	1.1-7	R (>= 3.2.0)
shape	shape	1.4.4	R (>= 2.01)
shiny	shiny	1.5.0	R (>= 3.0.2), methods
siggenes	siggenes	1.60.0	Biobase, multtest, splines, methods
snow	snow	0.4-3	R (>= 2.13.1), utils
SNPassoc	SNPassoc	1.9-2	R (>= 3.0.0), haplo.stats, survival, mvtnorm, parallel
sourcetools	sourcetools	0.1.7	R (>= 3.0.2)
sp	sp	1.4-2	R (>= 3.0.0), methods
spam	spam	2.5-1	R (>= 3.1), dotCall64, grid, methods
SparseM	SparseM	1.78	R (>= 2.15), methods
spatial	spatial	7.3-12	R (>= 3.0.0), graphics, stats, utils
splines	splines	3.6.0	NA
SQUAREM	SQUAREM	2020.4	R (>= 3.0)
stable	stable	1.1.4	R (>= 1.4), rmutil
stabledist	stabledist	0.7-1	R (>= 3.1.0)
statip	statip	0.2.3	R (>= 3.1.3)
statmod	statmod	1.4.34	R (>= 3.0.0)
stats	stats	3.6.0	NA
stats4	stats4	3.6.0	NA
stringi	stringi	1.4.6	R (>= 2.14)
stringr	stringr	1.4.0	R (>= 3.1)
SummarizedExperiment	SummarizedExperiment	1.16.1	R (>= 3.2), methods, GenomicRanges (>= 1.33.6), Biobase, DelayedArray (>= 0.3.20)
survey	survey	4	R (>= 3.1.0), grid, methods, Matrix, survival
survival	survival	3.2-3	R (>= 3.4.0)
survivalROC	survivalROC	1.0.3	R (>= 1.6.1)
survivalsvm	survivalsvm	0.0.5	survival
survminer	survminer	0.4.8	ggplot2, ggpubr(>= 0.1.6)
survMisc	survMisc	0.5.5	survival
sva	sva	3.34.0	R (>= 3.2), mgcv, genefilter, BiocParallel
sys	sys	3.4	NA
tableone	tableone	0.12.0	NA
tcltk	tcltk	3.6.0	NA
tcltk2	tcltk2	1.2-11	R (>= 2.8.0), tcltk
testthat	testthat	2.3.2	R (>= 3.1)
TH.data	TH.data	1.0-10	R (>= 2.10.0), survival, MASS
tibble	tibble	3.0.3	R (>= 3.1.0)
tidygraph	tidygraph	1.2.0	NA
tidyr	tidyr	1.1.2	R (>= 3.1)
tidyselect	tidyselect	1.1.0	R (>= 3.2)
timeDate	timeDate	3043.1	R (>= 2.15.1), graphics, utils, stats, methods
timeSeries	timeSeries	3062.1	R (>= 2.10), graphics, grDevices, stats, methods, utils, timeDate (>= 2150.95)
tinytex	tinytex	0.25	NA
tools	tools	3.6.0	NA
trimcluster	trimcluster	0.1-5	R (>= 1.9.0)
TSP	TSP	1.1-10	R (>= 3.5.0)
TTCA	TTCA	0.1.1	R(>= 2.10)
tweenr	tweenr	1.0.1	R (>= 3.2.0)
TxDb.Hsapiens.UCSC.hg19.knownGene	TxDb.Hsapiens.UCSC.hg19.knownGene	3.2.2	GenomicFeatures (>= 1.21.30)
UpSetR	UpSetR	1.4.0	R (>= 3.0)
usethis	usethis	1.6.1	R (>= 3.2)
utf8	utf8	1.1.4	R (>= 2.10)
utils	utils	3.6.0	NA
VariantAnnotation	VariantAnnotation	1.32.0	R (>= 2.8.0), methods, BiocGenerics (>= 0.15.3), GenomeInfoDb (>= 1.15.2), GenomicRanges (>= 1.37.4), SummarizedExperiment (>= 1.9.9), Rsamtools (>= 1.99.0)
vctrs	vctrs	0.3.3	R (>= 3.2)
vegan	vegan	2.5-6	permute (>= 0.9-0), lattice, R (>= 3.4.0)
VennDiagram	VennDiagram	1.6.20	R (>= 2.14.1), grid (>= 2.14.1), futile.logger
viridis	viridis	0.5.1	R (>= 2.10), viridisLite (>= 0.3.0)
viridisLite	viridisLite	0.3.0	R (>= 2.10)
webshot	webshot	0.5.2	R (>= 3.0)
whisker	whisker	0.4	NA
withr	withr	2.2.0	R (>= 3.2.0)
xfun	xfun	0.16	NA
xgboost	xgboost	0.90.0.2	R (>= 3.3.0)
XML	XML	3.99-0.3	R (>= 2.13.0), methods, utils
xml2	xml2	1.3.2	R (>= 3.1.0)
xopen	xopen	1.0.0	R (>= 3.1)
xtable	xtable	1.8-4	R (>= 2.10.0)
XVector	XVector	0.26.0	R (>= 2.8.0), methods, BiocGenerics (>= 0.19.2), S4Vectors (>= 0.21.13), IRanges (>= 2.15.12)
yaml	yaml	2.2.1	NA
zeallot	zeallot	0.1.0	NA
zip	zip	2.1.1	NA
zlibbioc	zlibbioc	1.32.0	NA
zoo	zoo	1.8-8	R (>= 3.1.0), stats
GEOquery	GEOquery	2.54.1	methods, Biobase
xml2	xml2	1.3.2	R (>= 3.1.0)

## Sheet: parameters
Parameter used for tuning the models:
Cox model function: coxph function in survival package (version 3.2-3); Parameter: default settings.
SVR model function: survivalsvm function in survivalsvm package (version 0.0.5); Parameter: gamma.mu = 0.1, type = regression, others with default.
Elastic-net model function: cv.glmnet function in glmnet package (version 4.0-2); Parameter: alpha = 0.5, family = cox, type.measure = deviance, foldid = 10, others with default.
