# Supplementary material for: Predicting lung adenocarcinoma disease progression using methylation-correlated blocks and ensemble machine learning classifiers
Source: PeerJ. 2021 Feb 16;9:e10884. doi: 10.7717/peerj.10884 (PMC7894106; doi:10.7717/peerj.10884)
Supplement: Table S6 [file peerj-09-10884-s009.xlsx]

## Sheet: Multivariate Cox in GEO
Association of clinicopathological characteristics with disease-free survival in the GEO data set
	coef	exp(coef)	se(coef)	z	p.value
age	-0.007885	0.992146	0.012747	-0.619	0.536201
geneder	0.412904	1.5112	0.2759	1.497	0.134505
smoking_history	-0.039791	0.96099	0.406804	-0.098	0.922081
pathologic_stage	0.029732	1.03018	0.31937	0.093	0.925827
RiskScore	2.13195	8.43131	0.61752	3.452	0.000556	**
Association of clinicopathological characteristics with disease-free survival in the validation set
	coef	exp(coef)	se(coef)	z	p.value
age	-0.01224	0.98783	0.02611	-0.469	0.63921
geneder	-0.63076	0.53219	0.57335	-1.1	0.27128
smoking_history	0.58659	1.79784	0.79524	0.738	0.46075
pathologic_stage	0.14867	1.1603	1.56985	0.095	0.92455
RiskScore	3.47365	32.2542	1.17511	2.956	0.00312	**
Association of clinicopathological characteristics with disease-free survival in the testing set
	coef	exp(coef)	se(coef)	z	p.value
age	-0.005312	0.994702	0.015425	-0.344	0.73056
geneder	1.05208	2.86362	0.373852	2.814	0.00489	**
smoking_history	-0.561276	0.57048	0.510976	-1.098	0.27201
pathologic_stage	-0.07791	0.925048	0.365333	-0.213	0.83113
RiskScore	1.69742	5.45984	0.714291	2.376	0.01748	*
